# Supplementary material for: Synthesis, Antibacterial and Antifungal Activity of New 3-Aryl-5H-pyrrolo[1,2-a]imidazole and 5H-Imidazo[1,2-a]azepine Quaternary Salts
Source: MDPI journal article supplement (doi:10.3390/molecules26144253), 2021-07-13

## SUPPLEMENTARY MATERIALS

### Synthesis, antibacterial and antifungal activity of new 3-aryl-5*H*-pyrrolo[1,2-*a*]imidazol and 5*H*-imidazo[1,2-*a*]azepin quaternary salts

Sergii Demchenko <sup>1</sup>, Roman Lesyk <sup>2,\*</sup>, Oleh Yadlovskyi <sup>1</sup>, Johannes Zuegg <sup>3</sup>, Alysha G. Elliott <sup>3</sup>, Iryna Drapak <sup>4</sup>, Yuliia Fedchenkova <sup>5</sup>, Zinaida Suvorova <sup>1</sup>, Anatolii Demchenko <sup>1,5</sup>

<sup>1</sup> Institute of Pharmacology and Toxicology, Antona Tsedika 14, 03057 Kyiv, Ukraine.

<sup>2</sup> Department of Public Health, Dietetics and Lifestyle Disorders, Faculty of Medicine, University of Information Technology and Management in Rzeszow, Sucharskiego 2, 35-225 Rzeszow, Poland

<sup>3</sup> The Community for Open Antimicrobial Drug Discovery (CO-ADD), Centre for Superbug Solutions, Institute for Molecular Bioscience, The University of Queensland, Brisbane 4072, Australia

<sup>4</sup> Department of General, Inorganic, Physical and Colloidal Chemistry, Danylo Halytsky Lviv National Medical University, Pekarska 69, 79010 Lviv-10, Ukraine

<sup>5</sup> Nizhyn Mykola Gogol State University, Nizhyn, Ukraine

\*corresponding author

*dr\_r\_lesyk@org.lviv.net* (R. Lesyk)

tel. +38 0322 75-59-66

fax. +38 0322 75-77-34

## Copies of NMR spectra

### 3-(4-Chlorophenyl)-1-(2-isopropyl-5-methyl-cyclohexyloxycarbonylmethyl)-6,7-dihydro-5H-pyrrolo[1,2-a]imidazol-1-ium chloride (5)

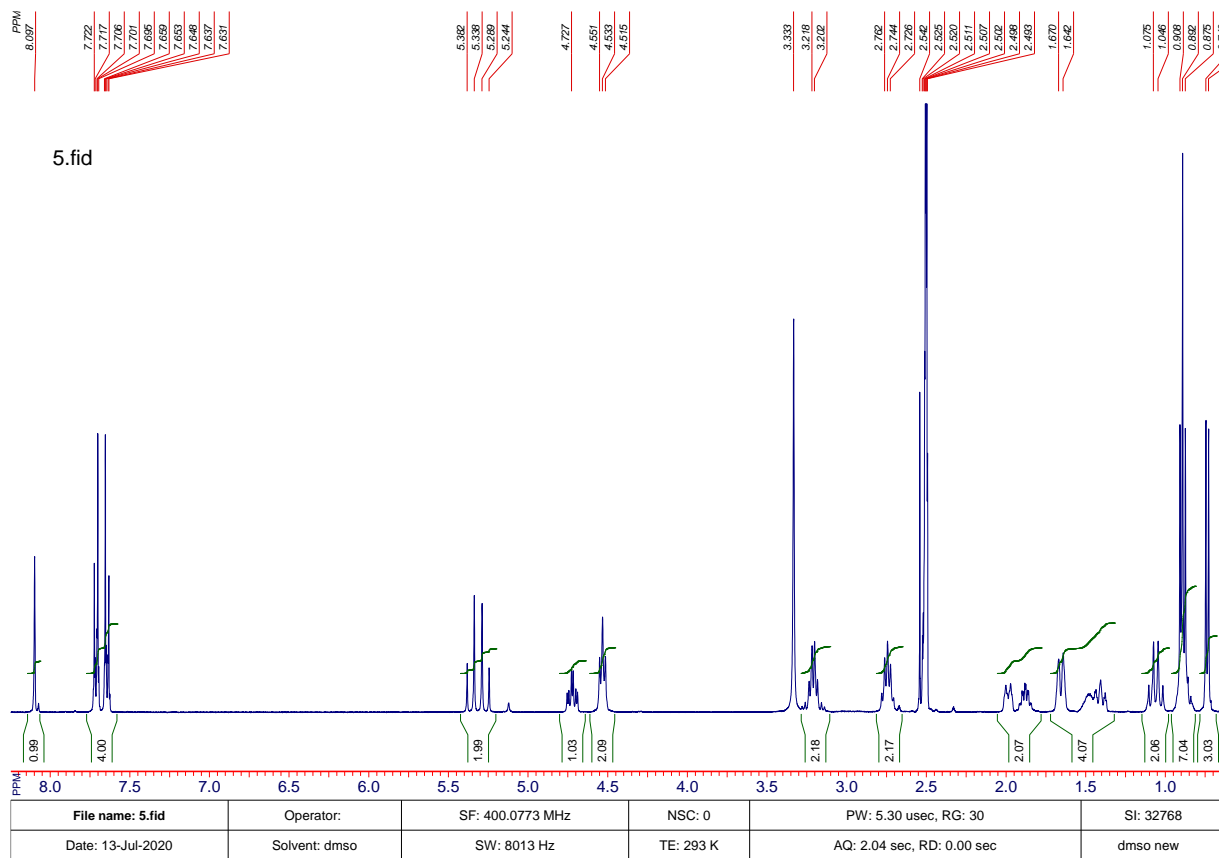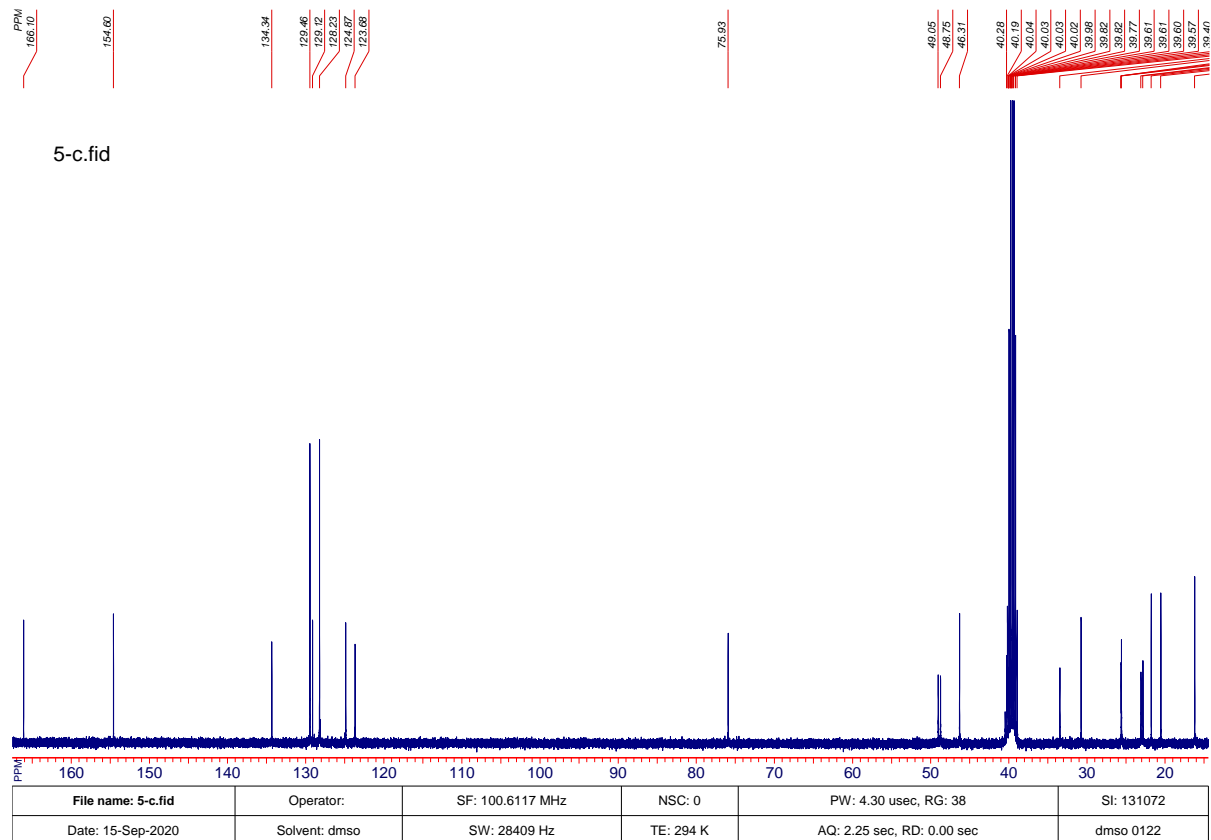

*3-(4-Fluorophenyl)-1-[(4-phenoxyphenylcarbamoyl)-methyl]-6,7-dihydro-5H-pyrrolo[1,2-a]imidazol-1-ium chloride (6a)*

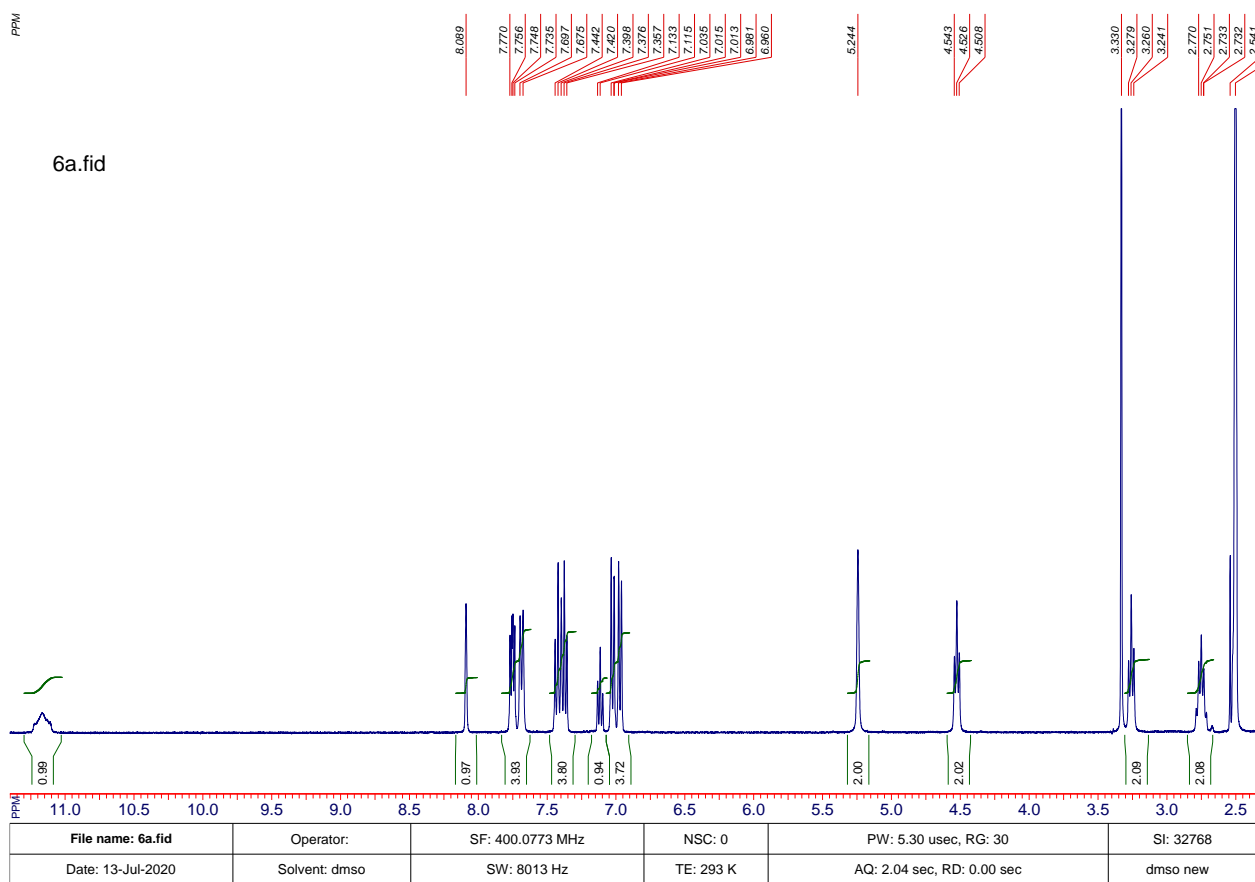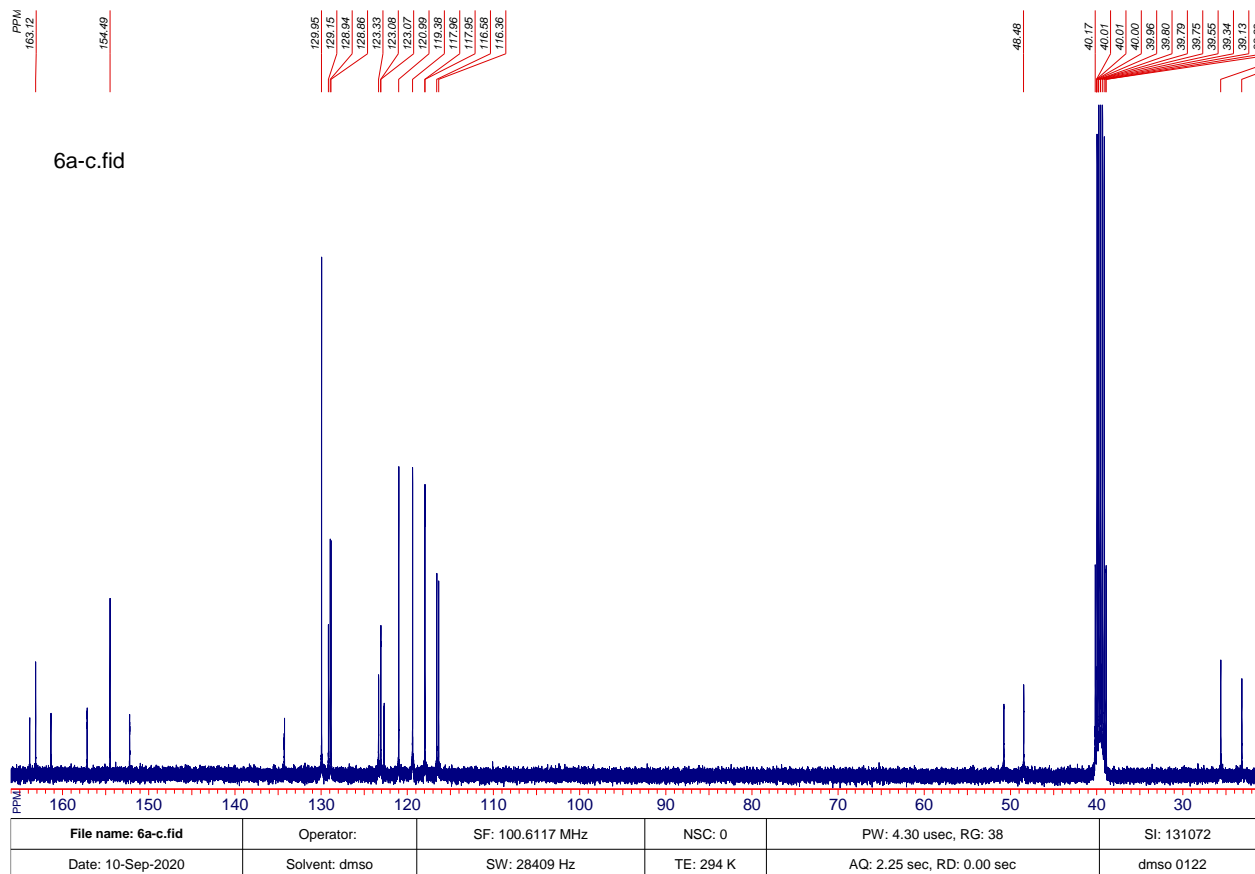

*3-(4-Chlorophenyl)-1-[(4-phenoxyphenylcarbamoyl)-methyl]-6,7-dihydro-5H-pyrrolo[1,2-a]imidazol-1-ium chloride (6b)*

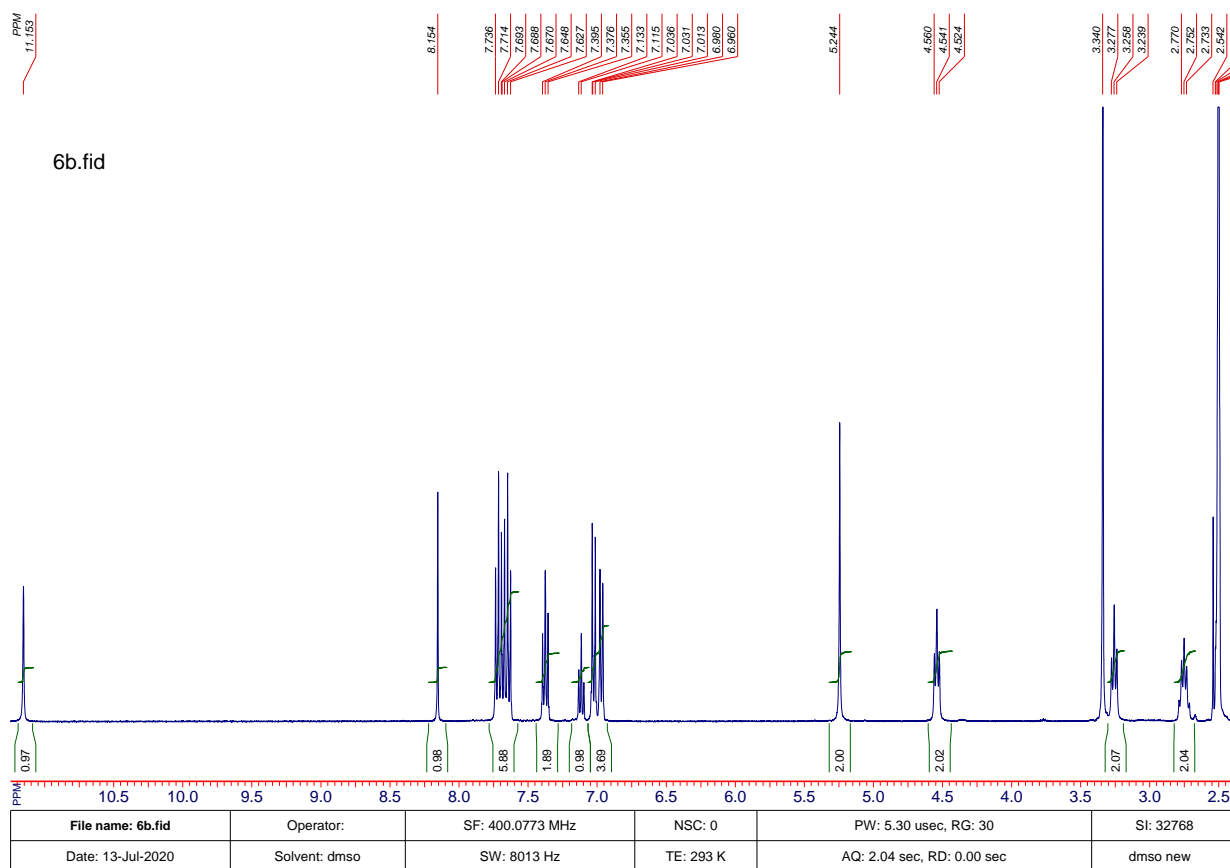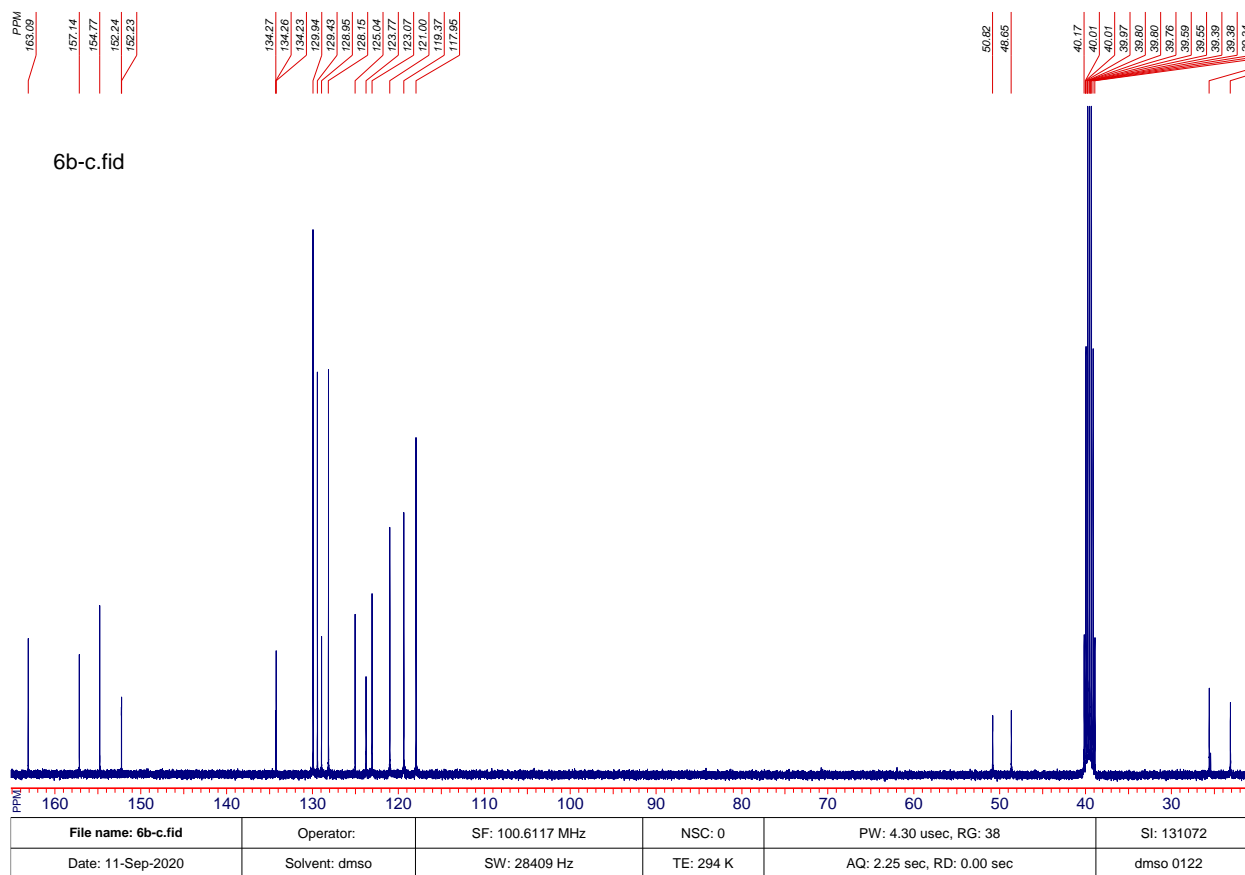

3-(3,4-Dichlorophenyl)-1-[(4-phenoxyphenylcarbamoyl)-methyl]-6,7-dihydro-5H-pyrrolo[1,2-a]imidazol-1-ium chloride (**6c**)

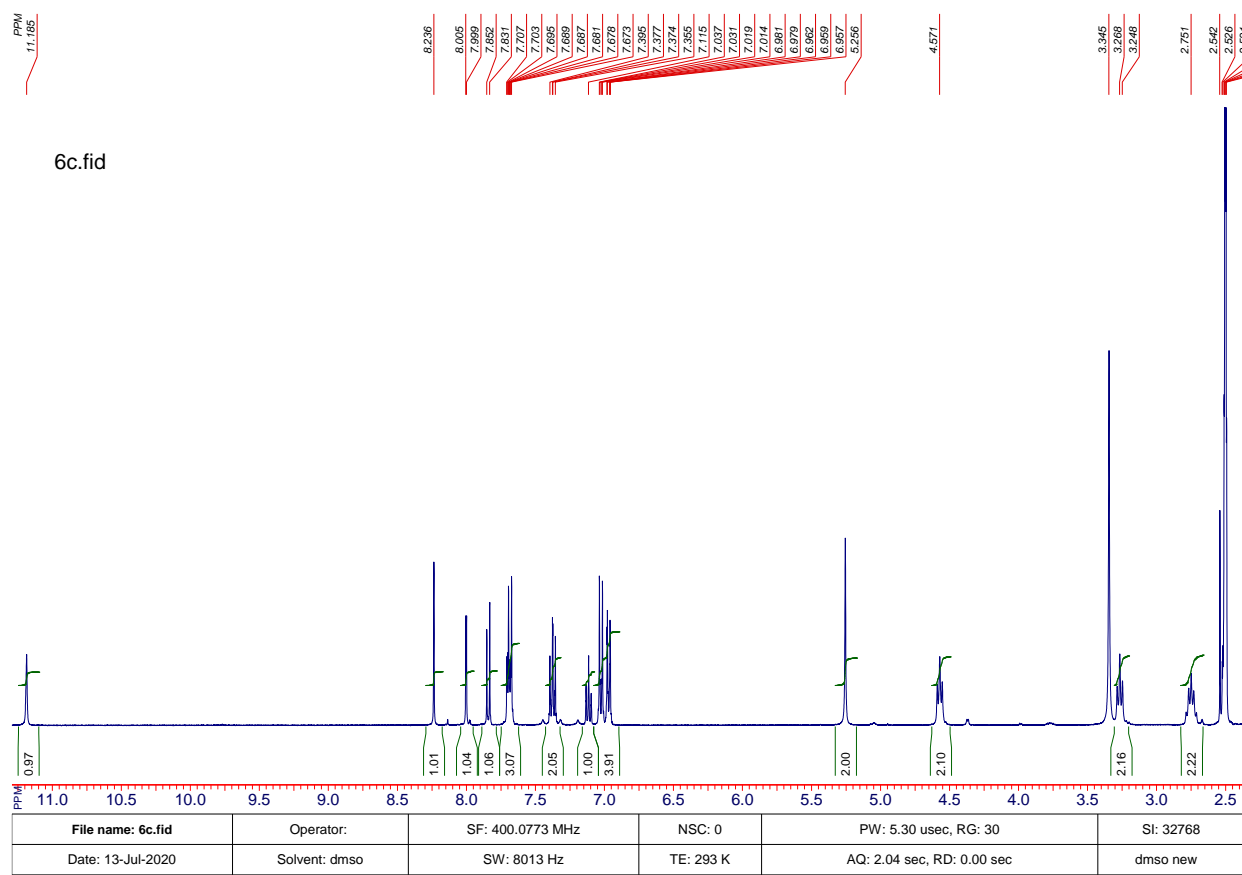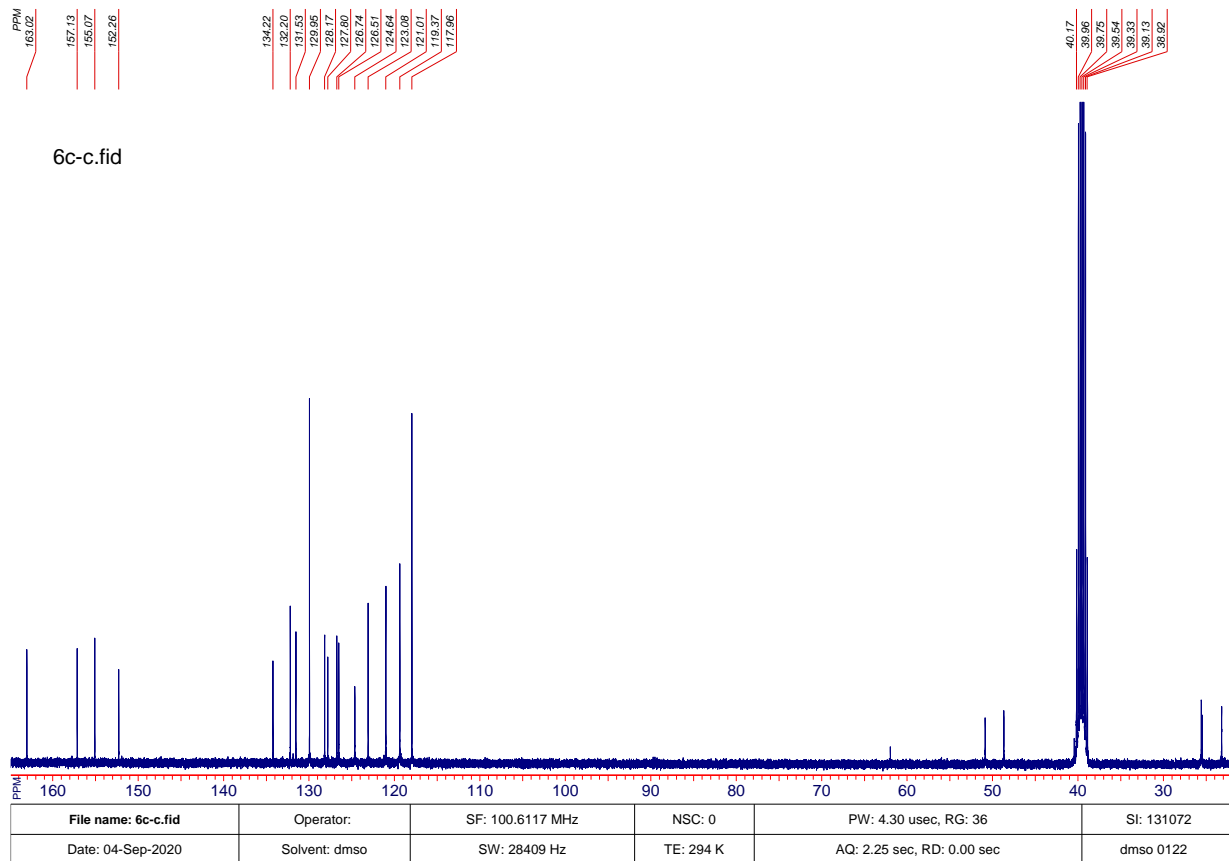

*3-(4-Methoxyphenyl)-1-[(4-phenoxyphenylcarbamoyl)-methyl]-6,7-dihydro-5H-pyrrolo[1,2-a]imidazol-1-ium chloride (6d)*

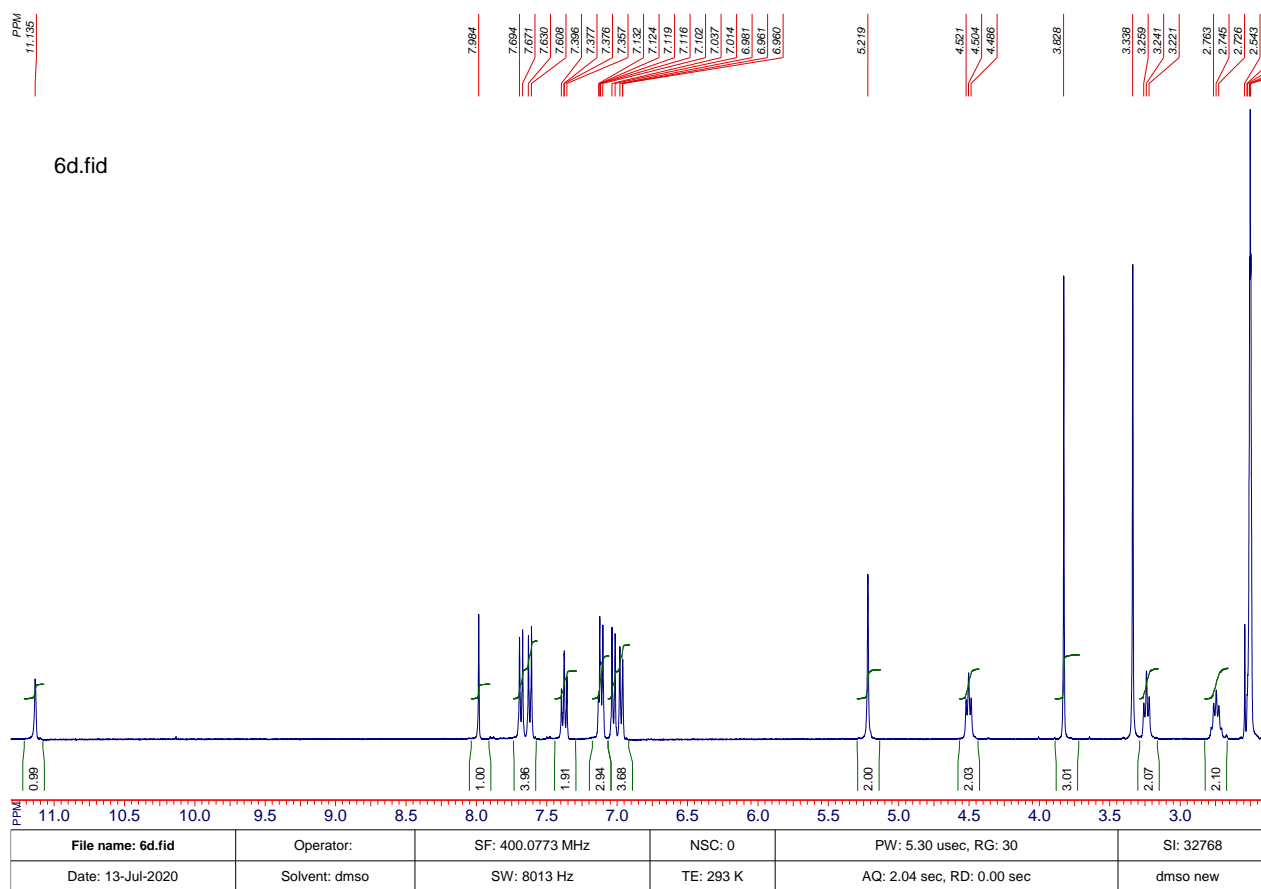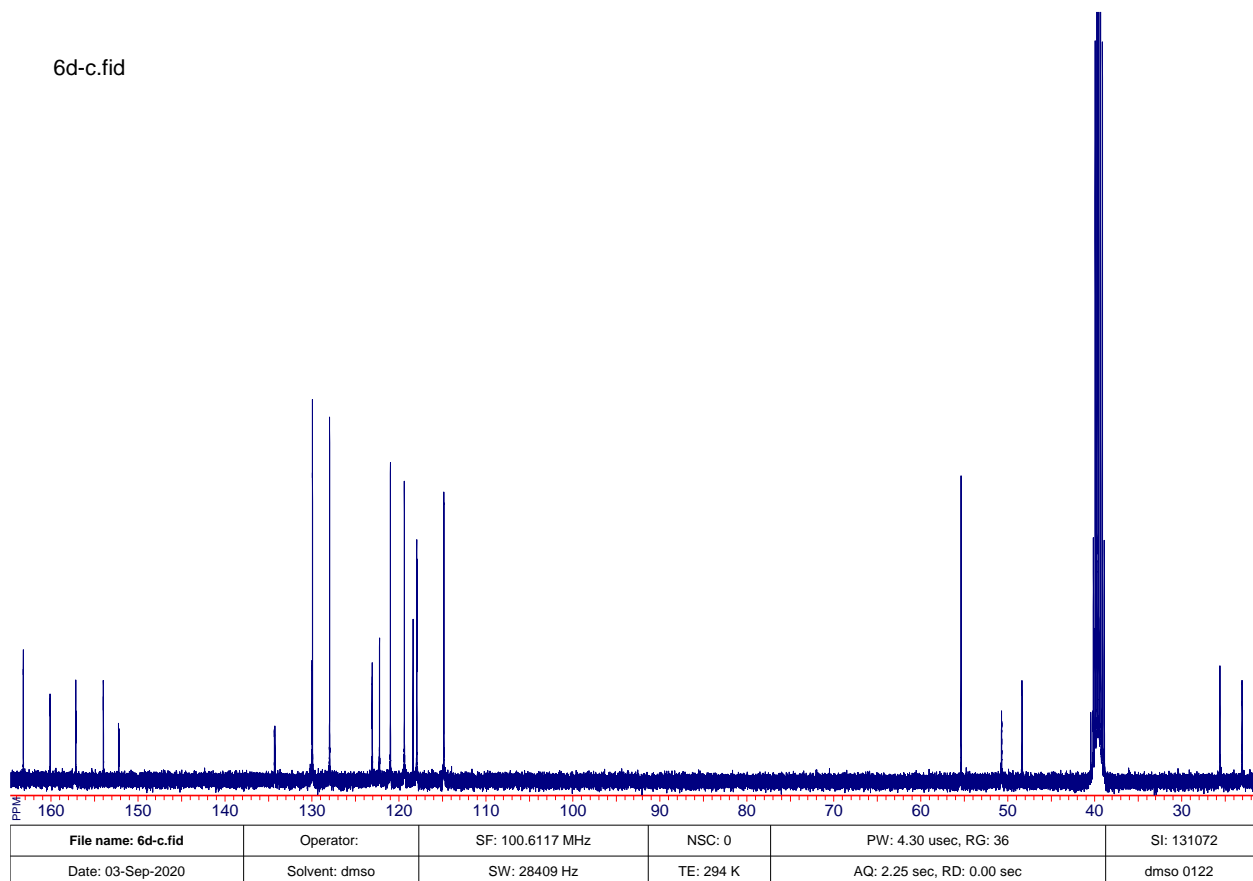

*1-[(4-Phenoxyphenylcarbamoyl)-methyl]-3-p-tolyl-6,7-dihydro-5H-pyrrolo[1,2-a]imidazol-1-ium chloride (6e)*

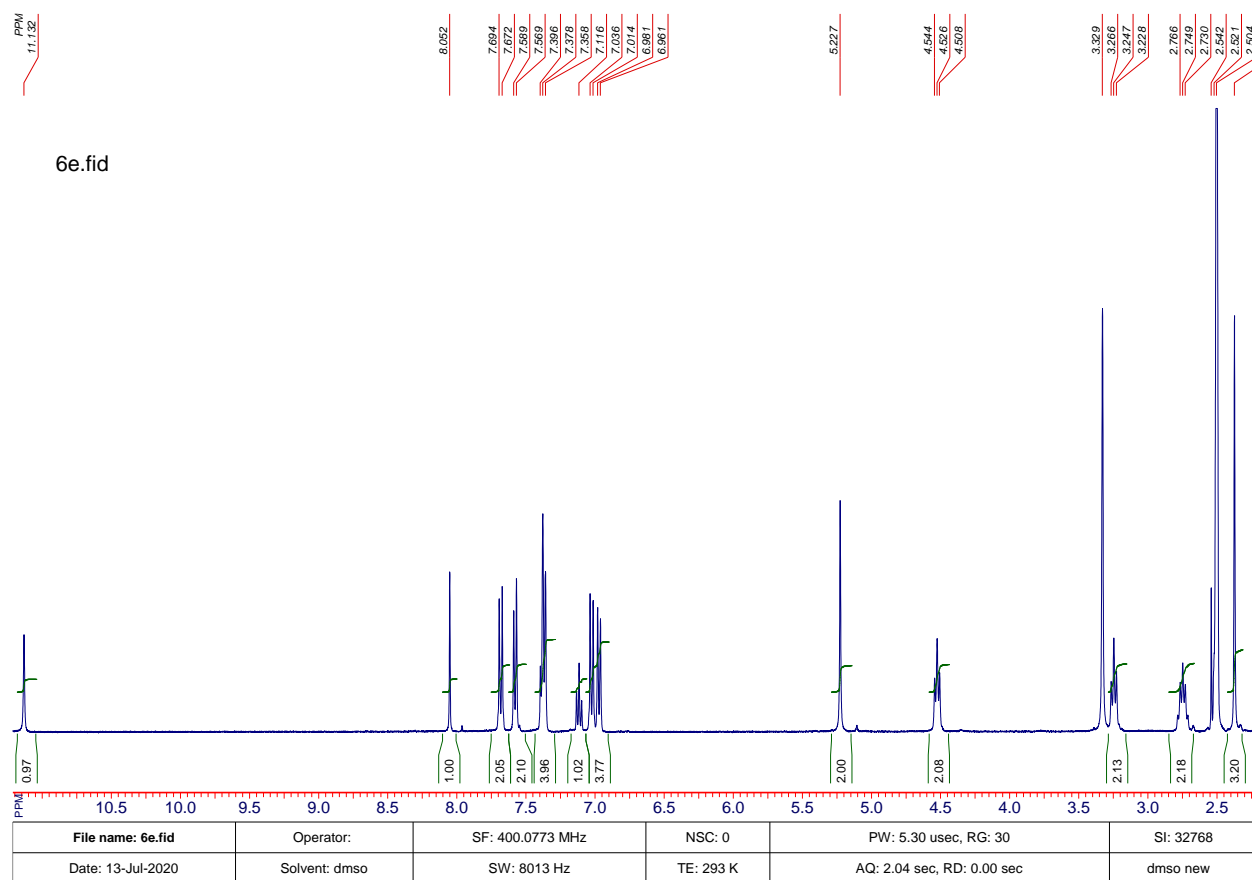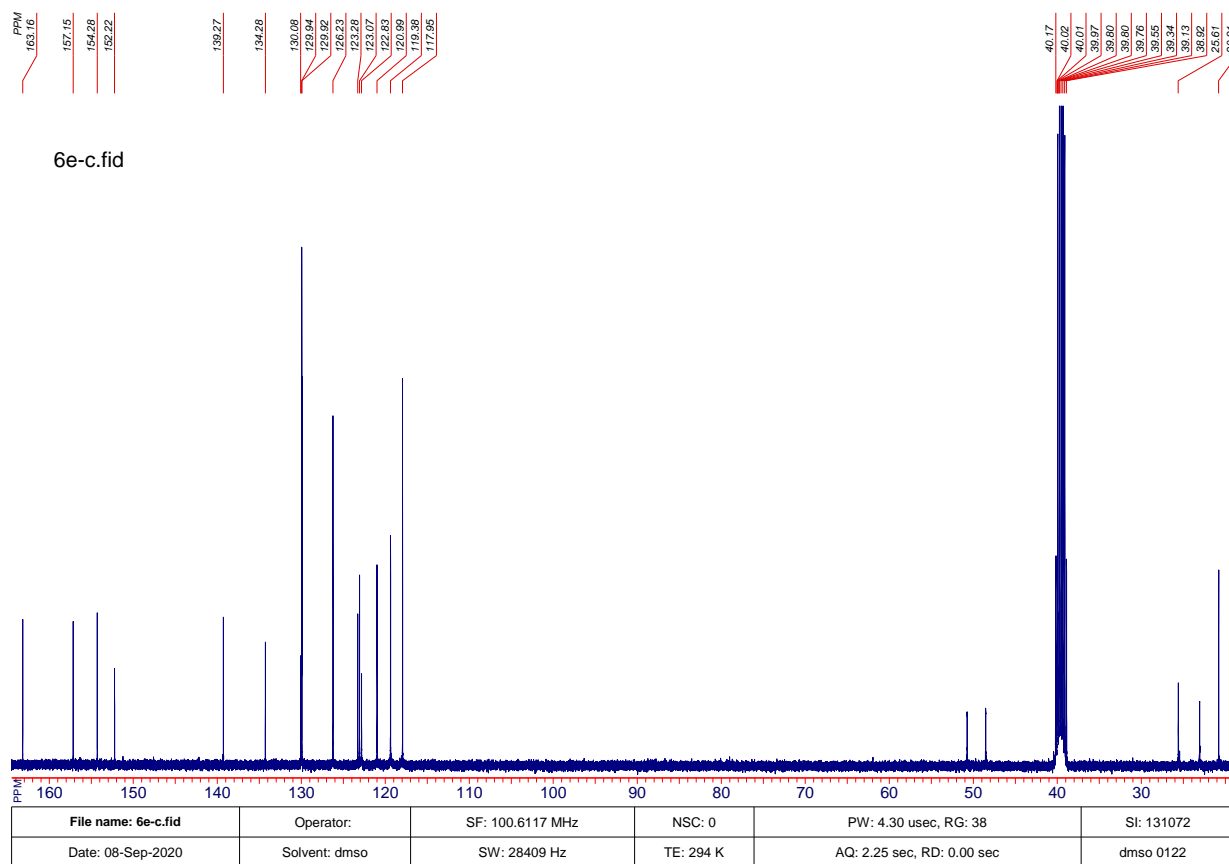

*1-(3,4-Dichlorobenzyl)-3-phenyl-6,7,8,9-tetrahydro-5H-imidazo[1,2-a]azepin-1-ium bromide (9)*

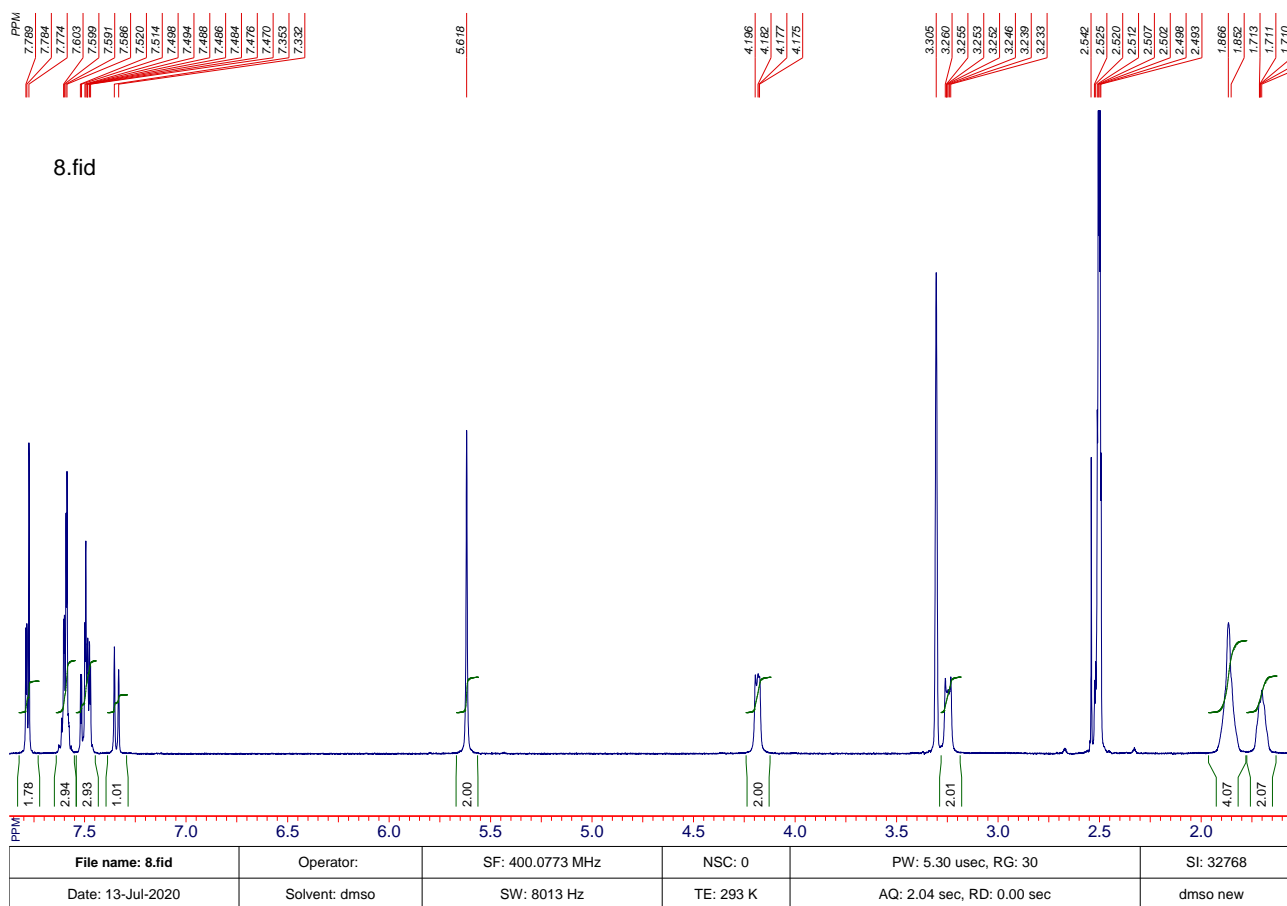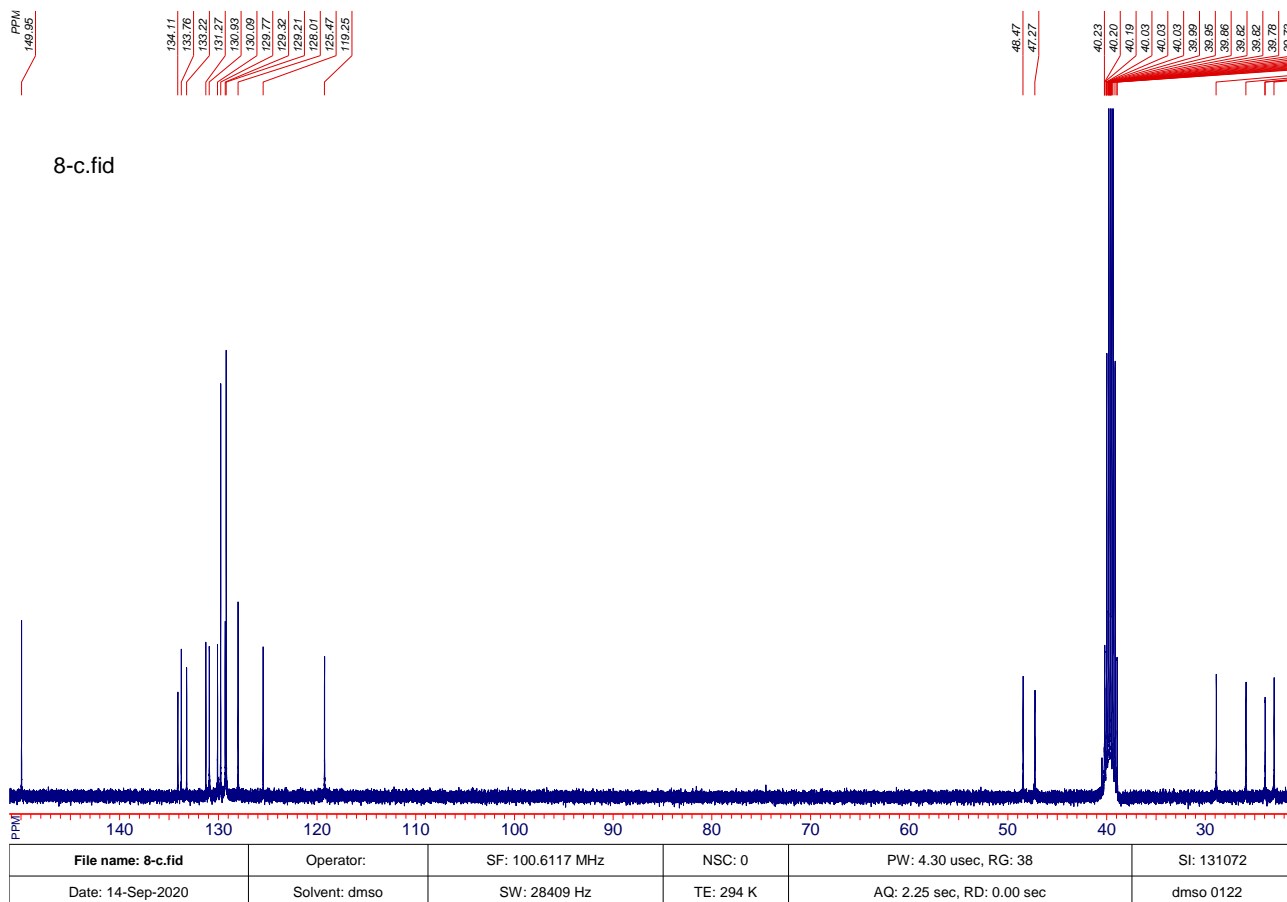



*1-[2-(2-Difluoromethoxyphenyl)-2-oxoethyl]-3-phenyl-6,7,8,9-tetrahydro-5H-imidazo[1,2-a]azepin-1-ium bromide (10a)*

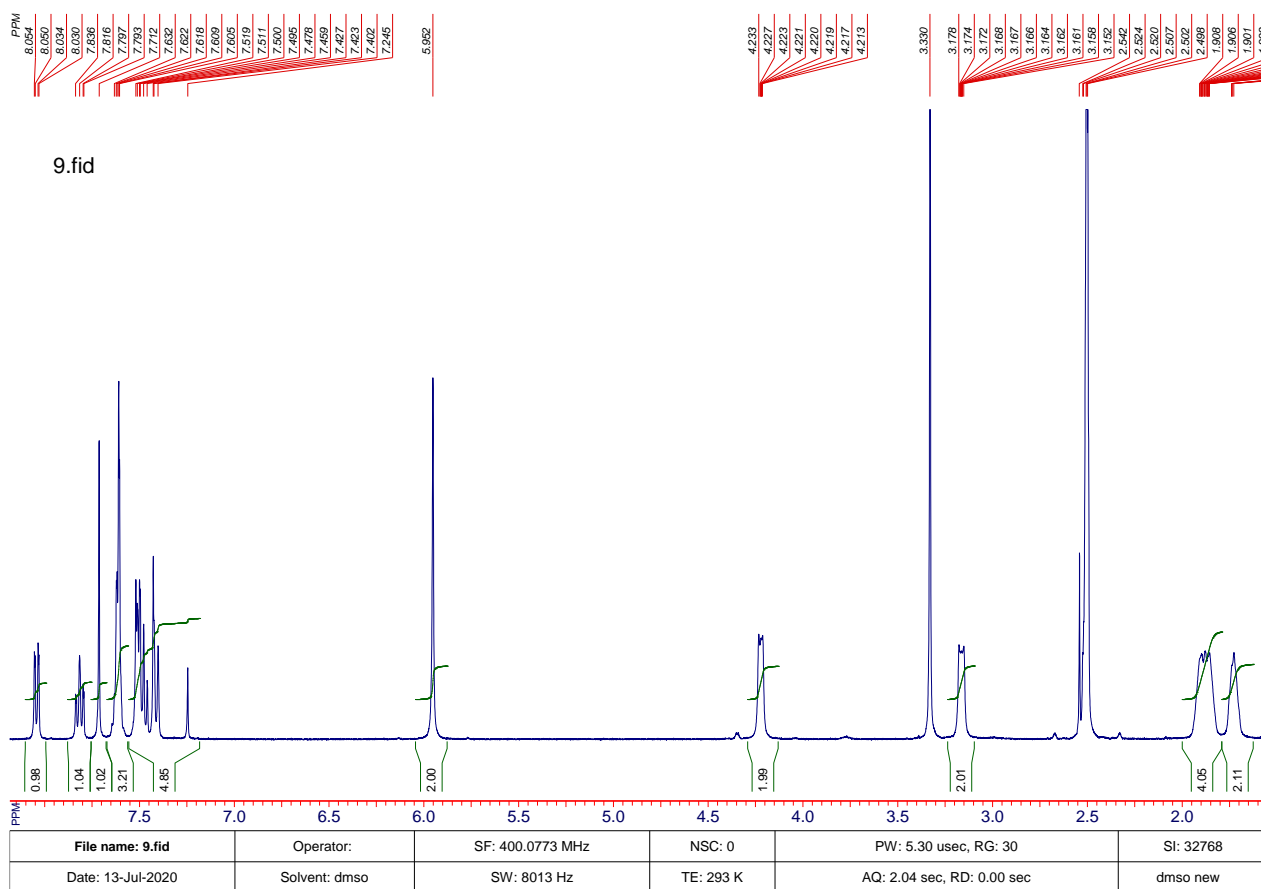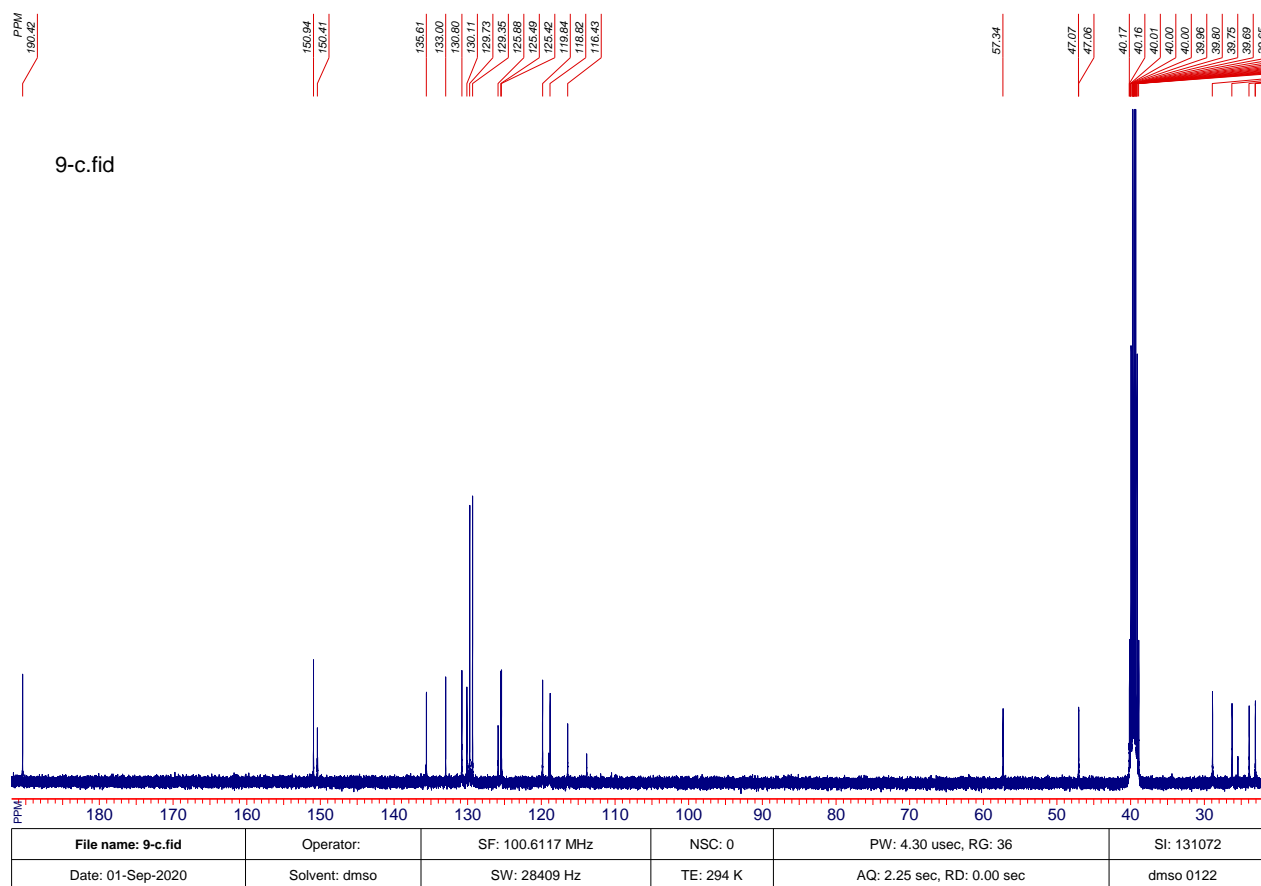

*1-[2-(4-Isopropylphenyl)-2-oxoethyl]-3-phenyl-6,7,8,9-tetrahydro-5H-imidazo[1,2-a]azepin-1-ium bromide (10b)*

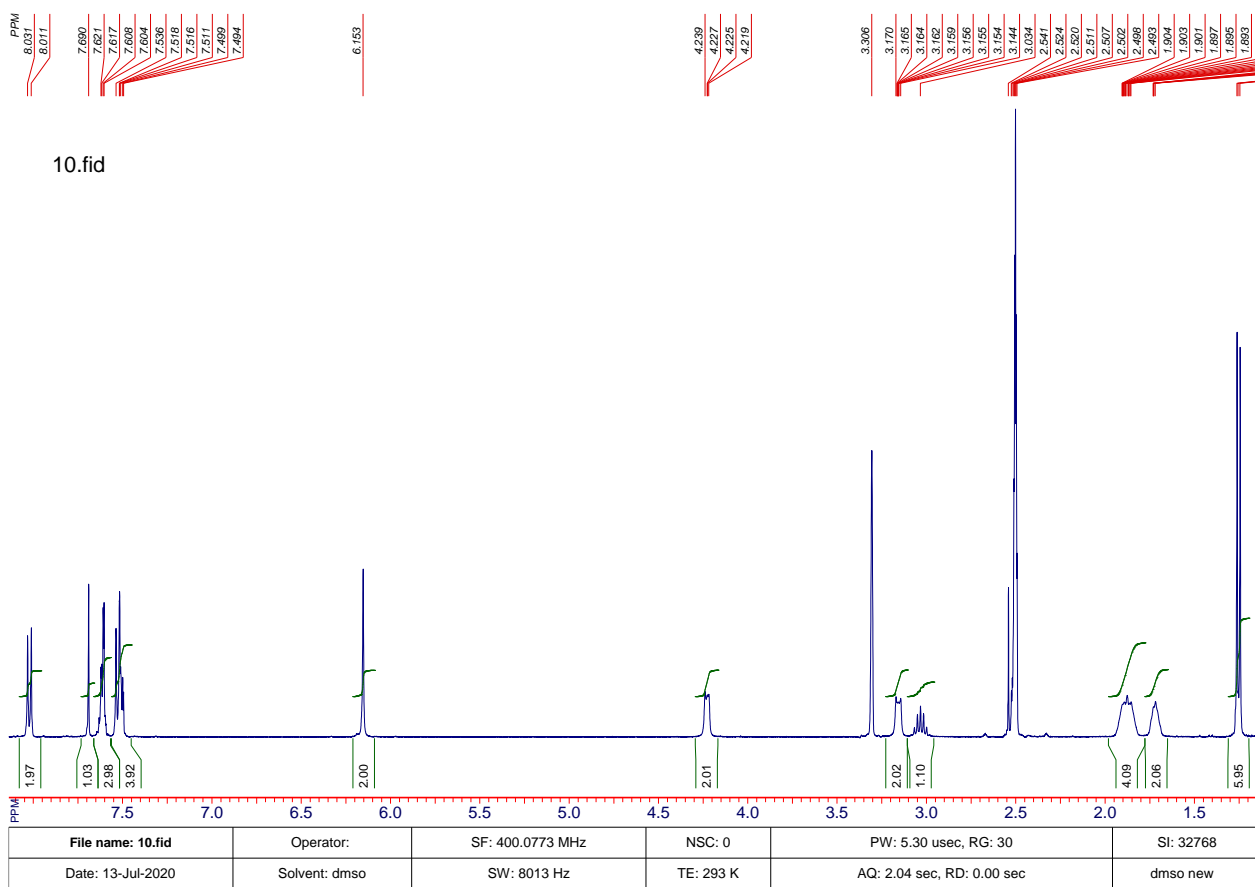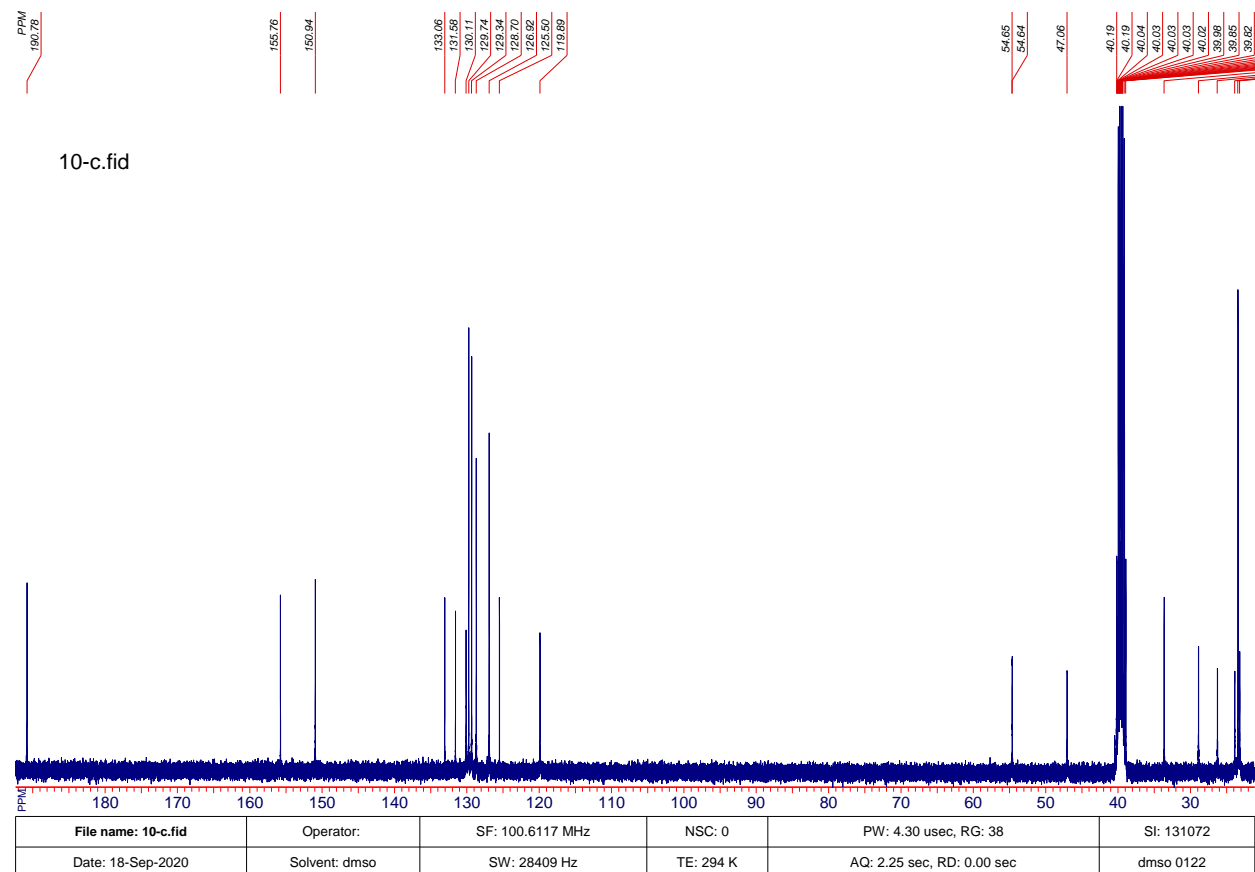

*1-[2-Oxo-2-(4-phenoxyphenyl)-ethyl]-3-phenyl-6,7,8,9-tetrahydro-5H-imidazo[1,2-a]azepin-1-ium bromide (10c)*

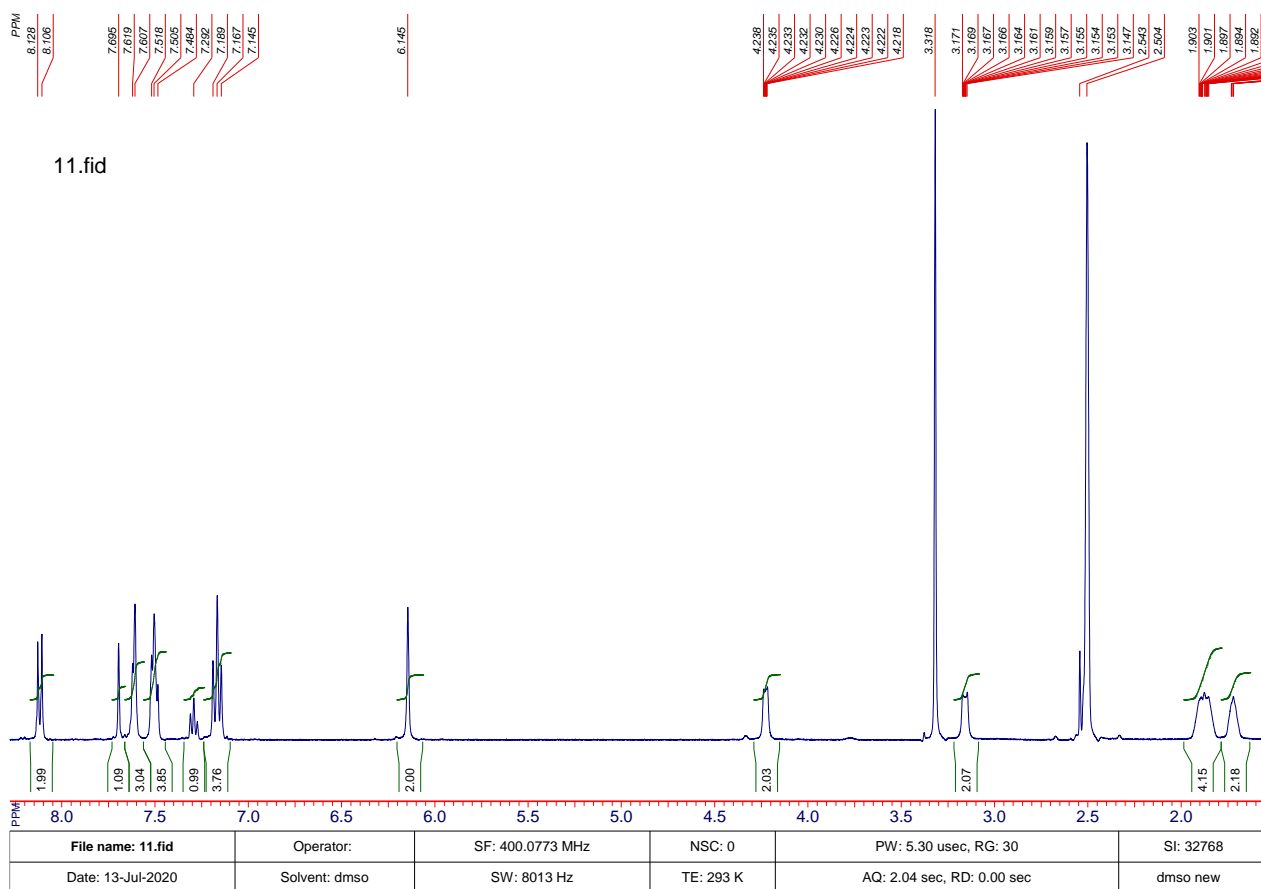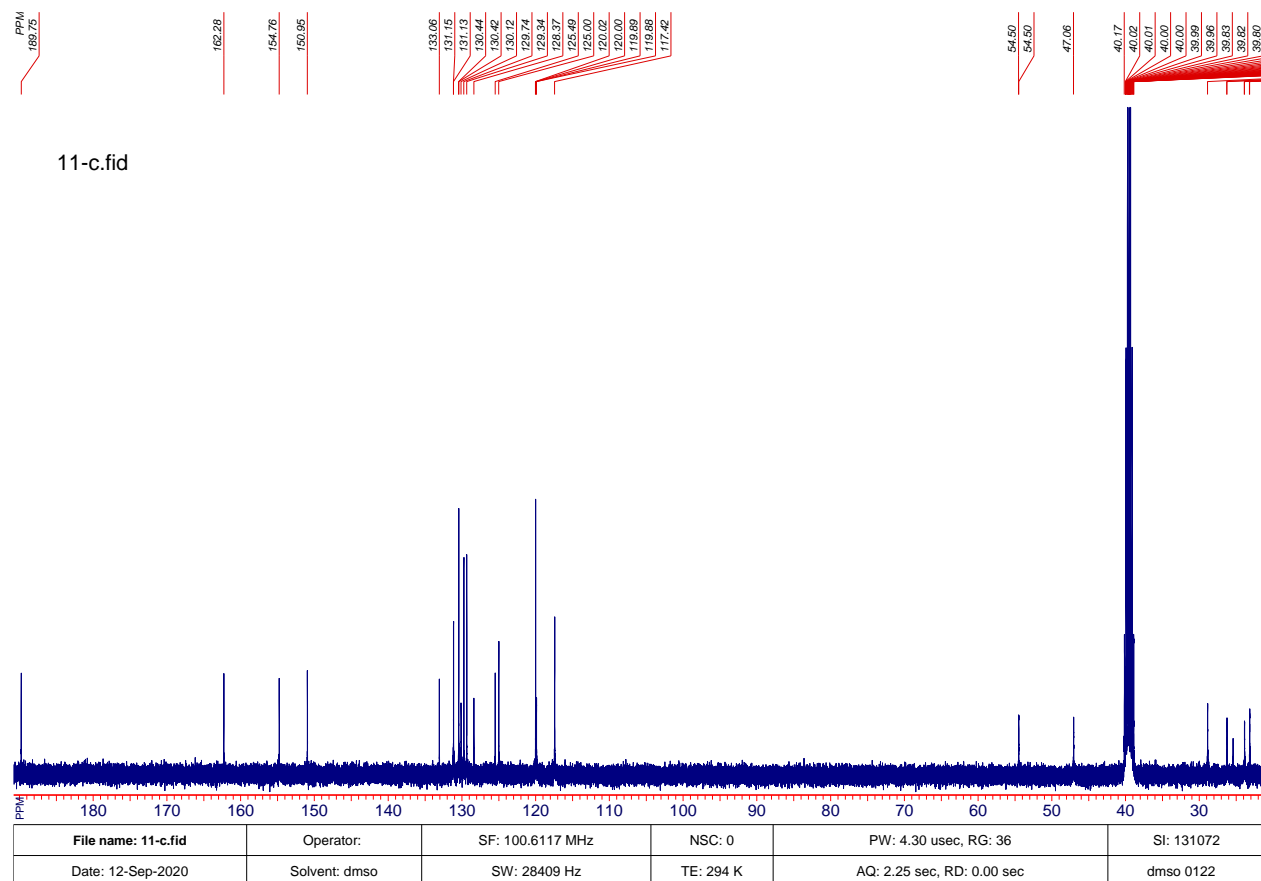

*1-[2-(4-Cyclohexylphenyl)-2-oxoethyl]-3-(4-fluorophenyl)-6,7,8,9-tetrahydro-5H-imidazo[1,2-a]azepin-1-ium bromide (10d)*

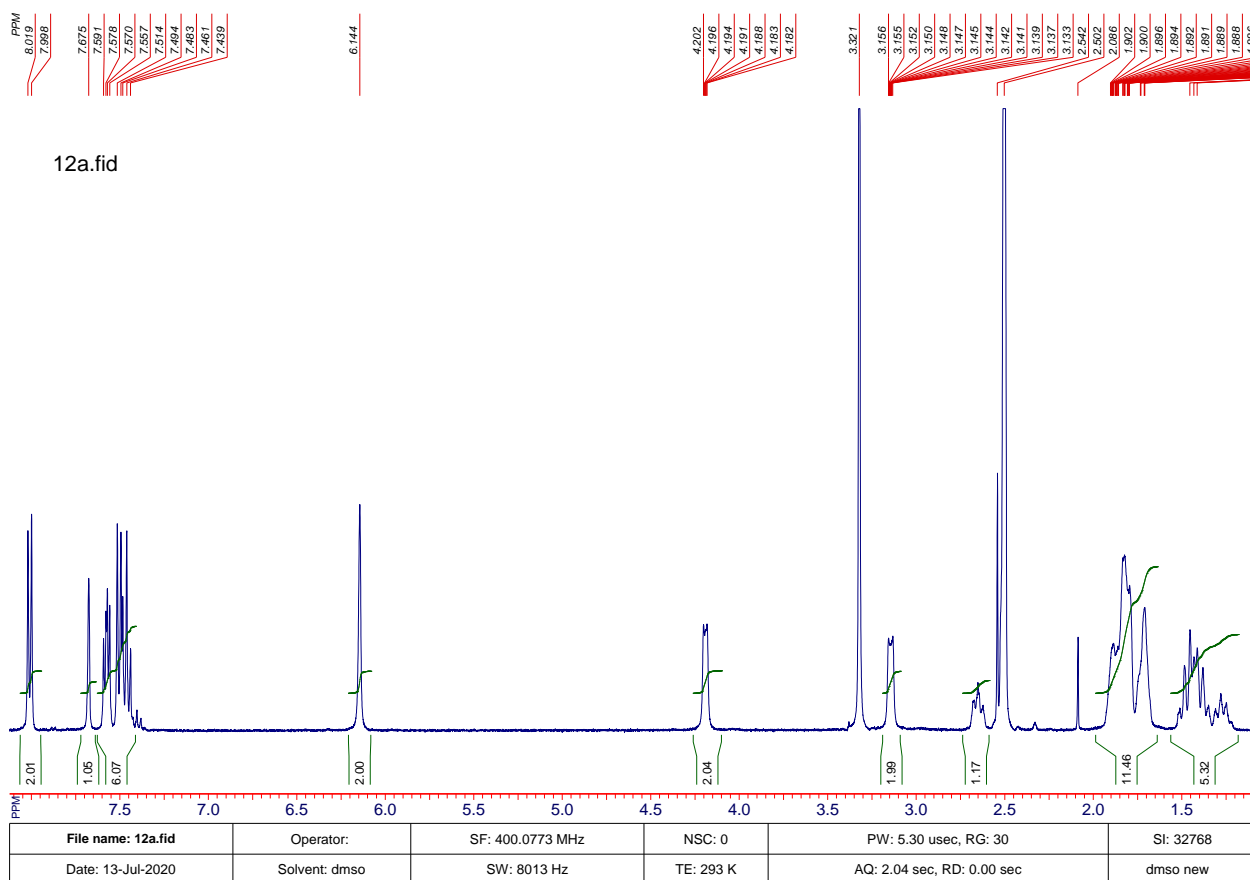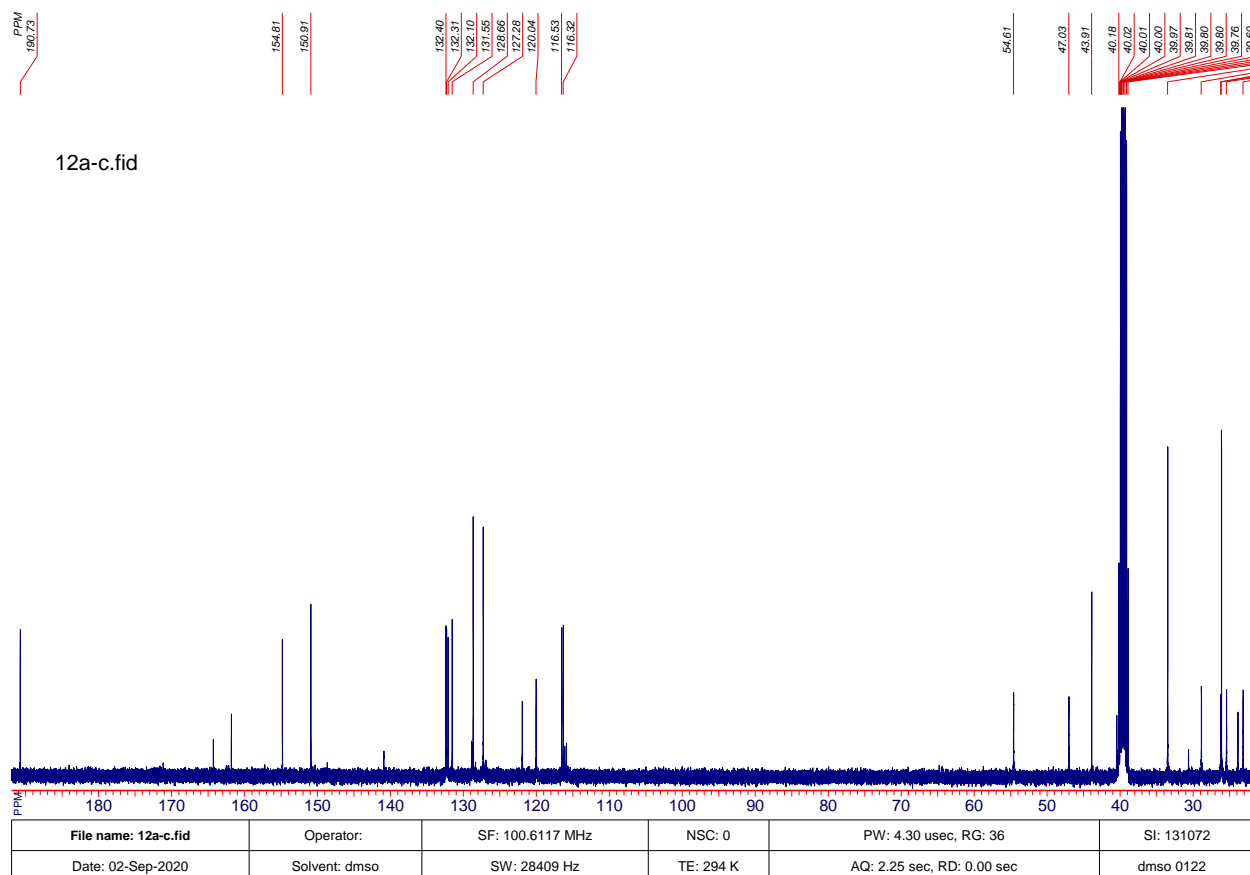

*3-(4-Chlorophenyl)-1-[2-(4-cyclohexylphenyl)-2-oxoethyl]-6,7,8,9-tetrahydro-5H-imidazo[1,2-a]azepin-1-ium bromide (10e)*

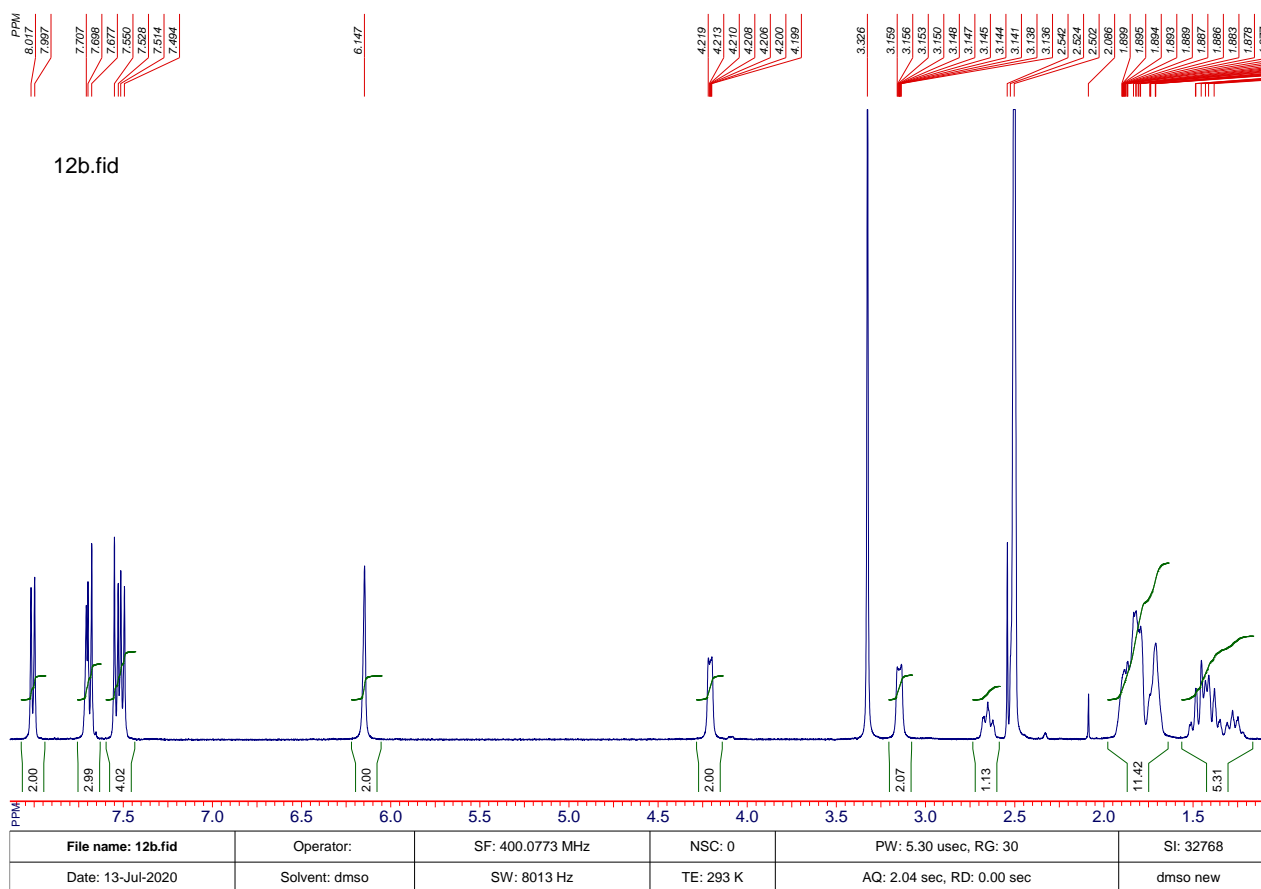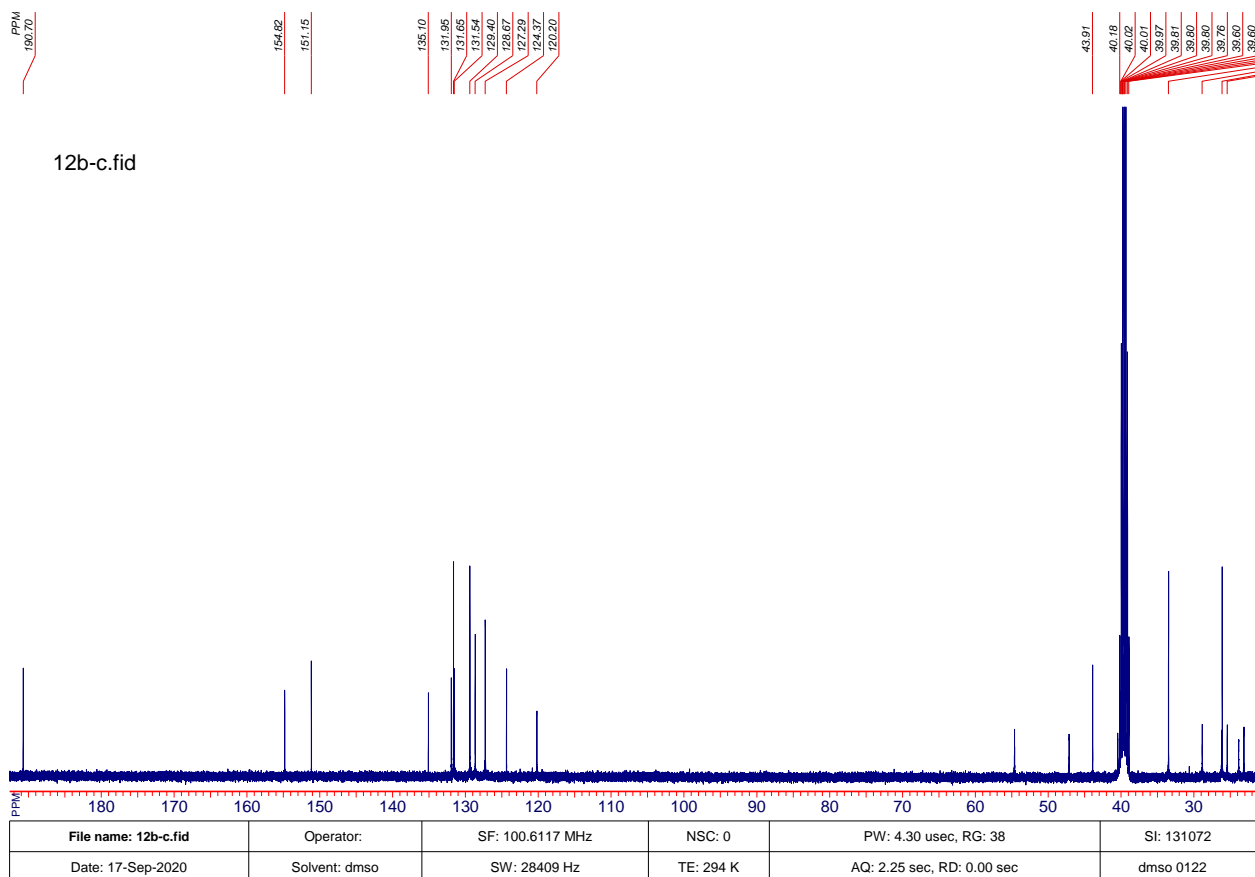

*1-[2-(4-Bromophenyl)-2-oxoethyl]-3-(3,4-dichlorophenyl)-6,7,8,9-tetrahydro-5H-imidazo[1,2-a]azepin-1-ium bromide (10f)*

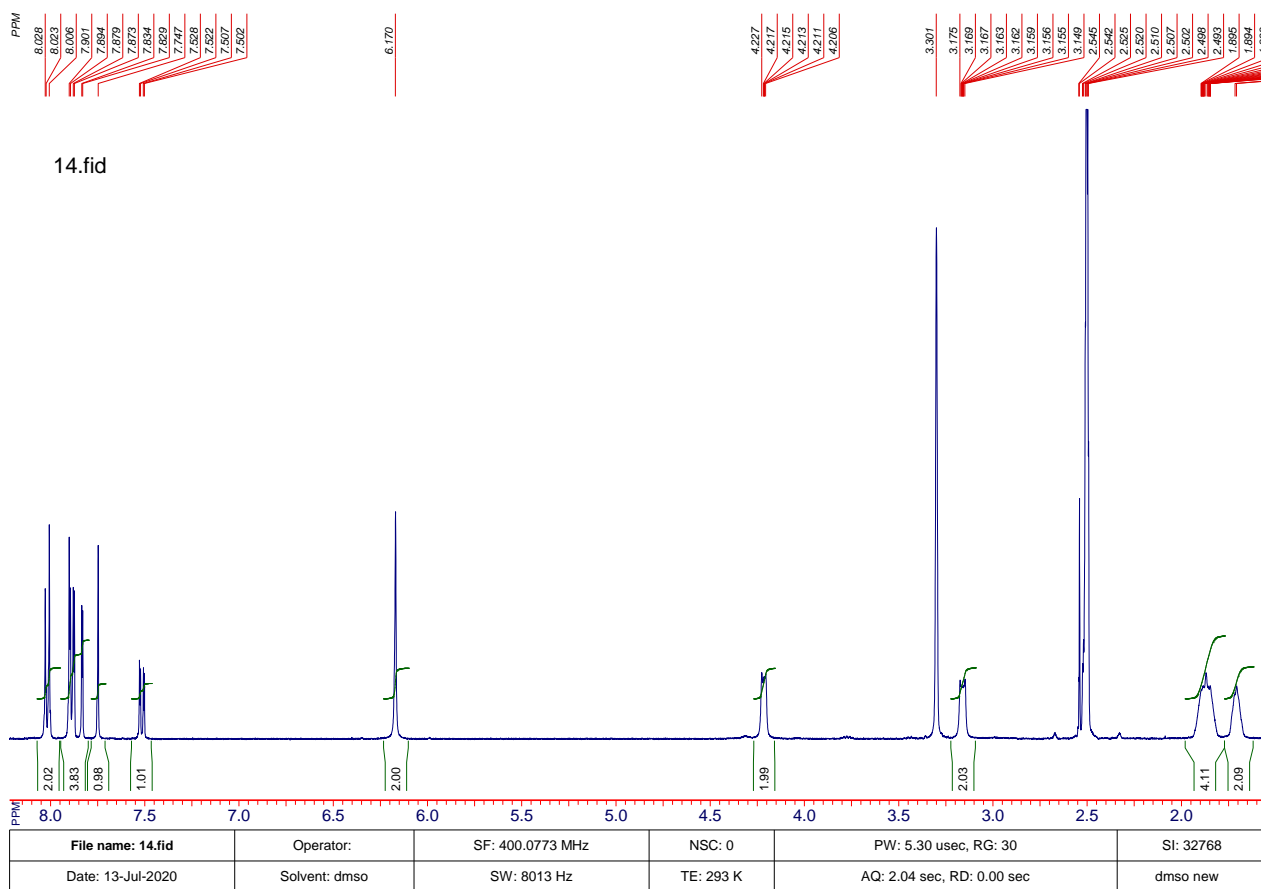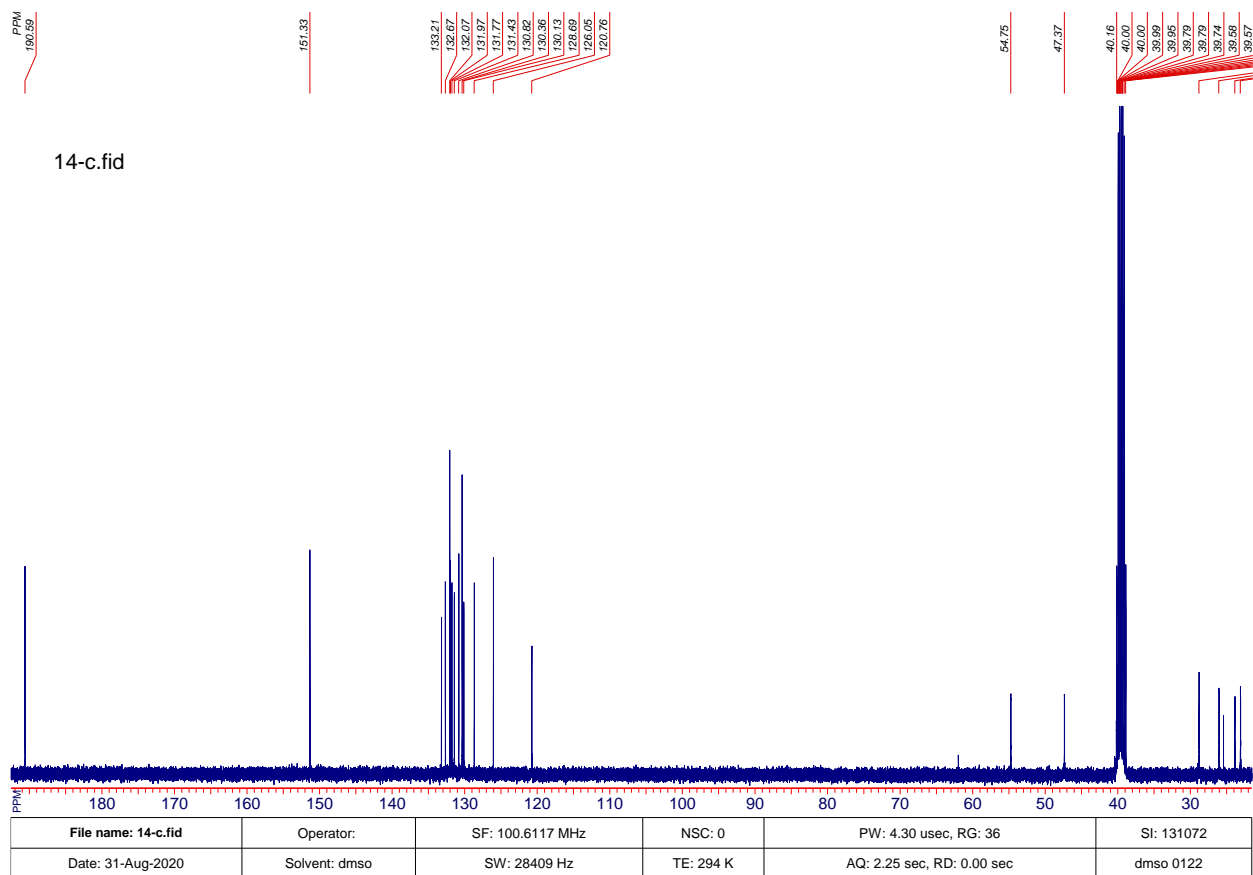

*3-(3,4-Dichlorophenyl)-1-[2-(4-methoxyphenyl)-2-oxoethyl]-6,7,8,9-tetrahydro-5H-imidazo[1,2-a]azepin-1-ium bromide (10h)*

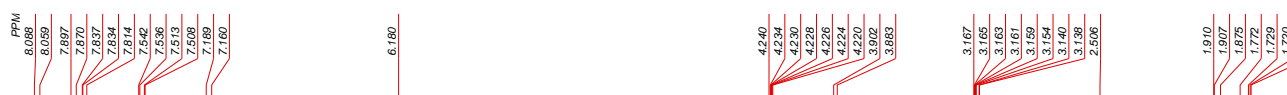

10h

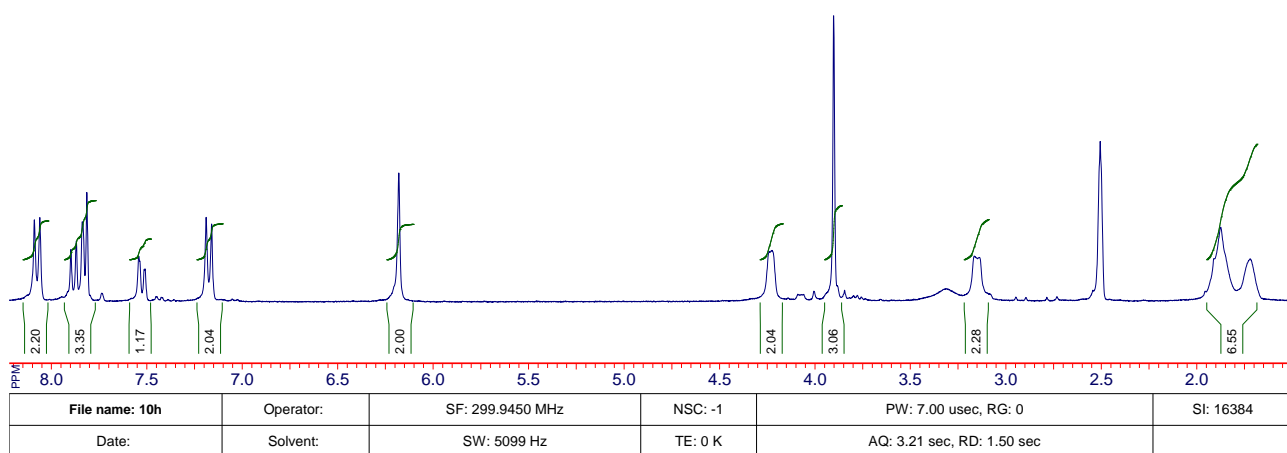

13.fid

PPM

File name: 13.fid      Operator:      SF: 400.0773 MHz      NSC: 0      PW: 5.30 usec, RG: 30      SI: 32768  
Date: 13-Jul-2020      Solvent: dmso      SW: 8013 Hz      TE: 293 K      AQ: 2.04 sec, RD: 0.00 sec      dmso new

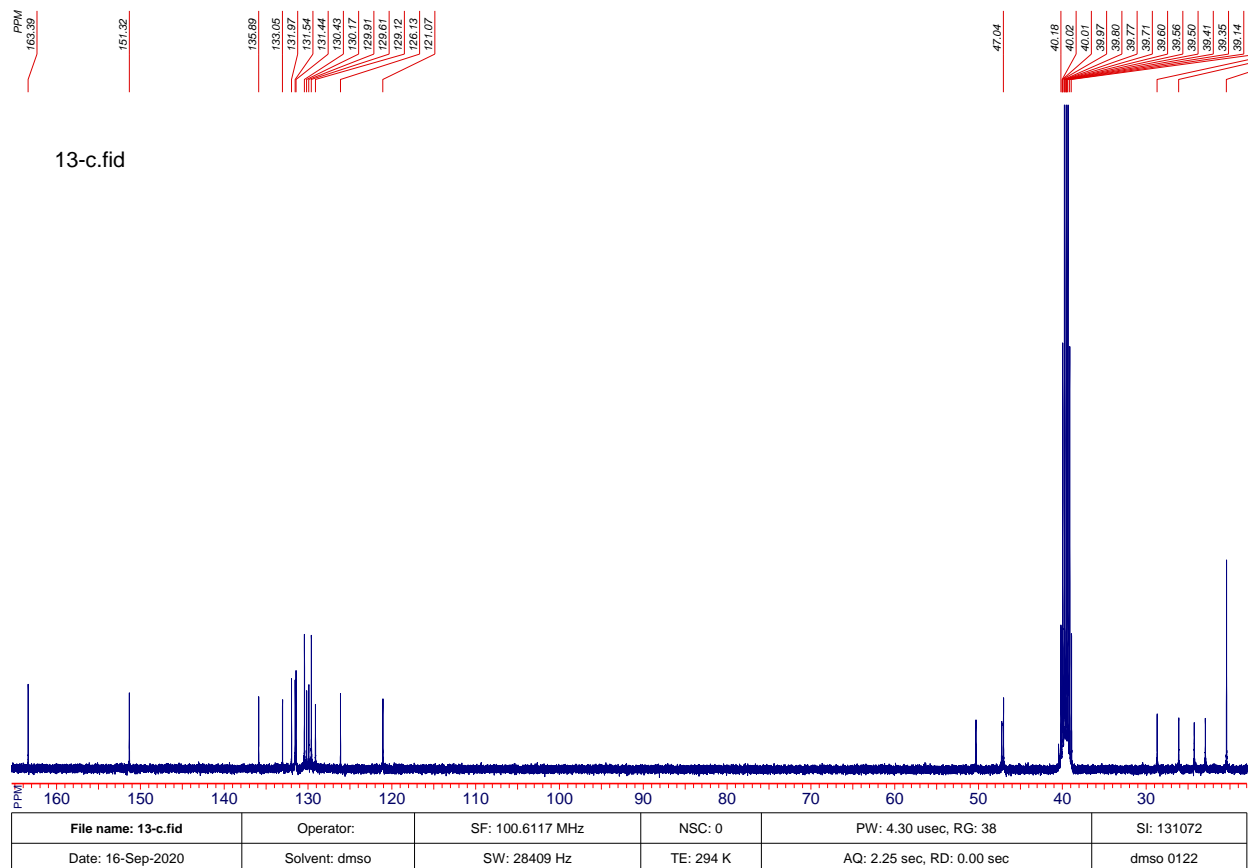



*1-(2-Isopropyl-5-methyl-cyclohexyloxycarbonylmethyl)-3-(4-methoxyphenyl)-6,7,8,9-tetrahydro-5H-imidazo[1,2-a]azepin-1-ium chloride (12)*

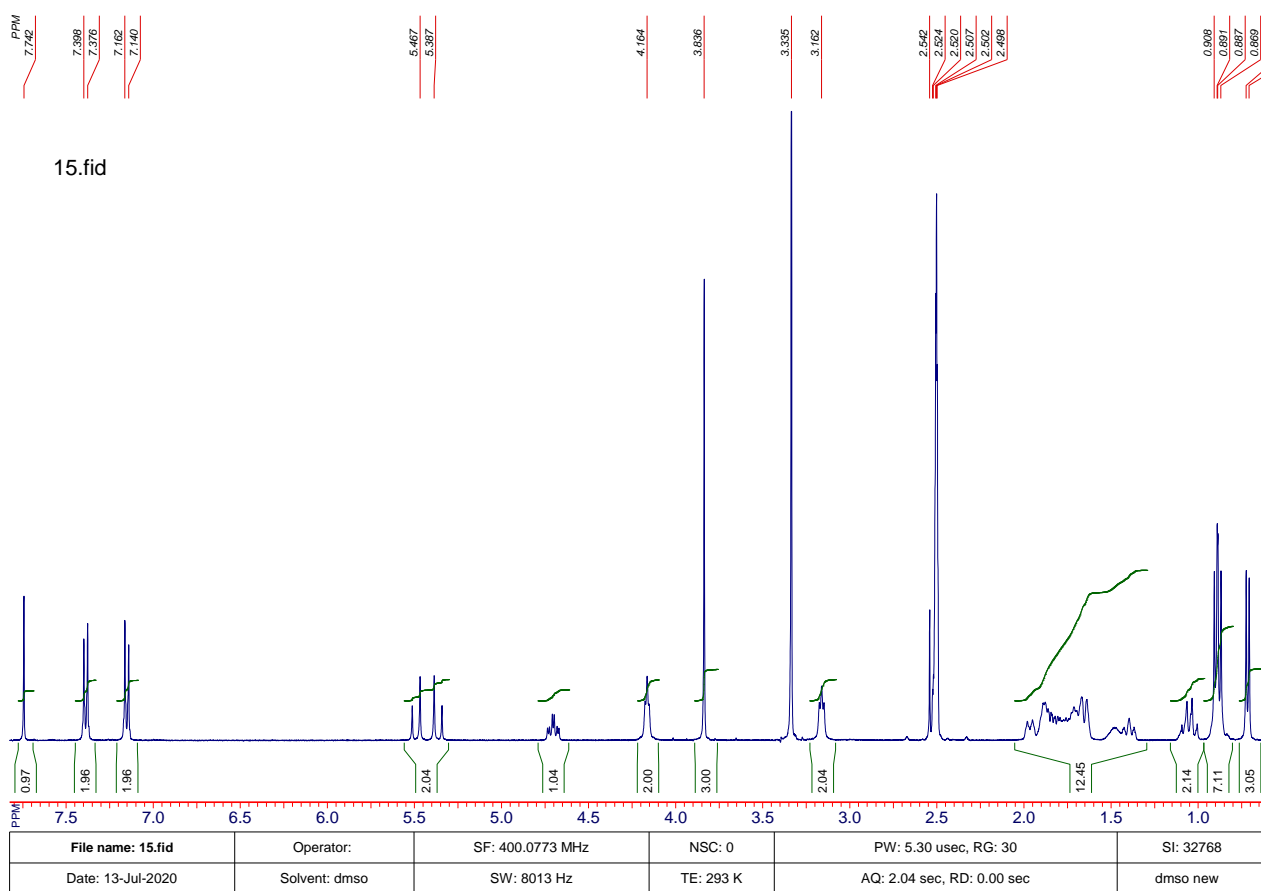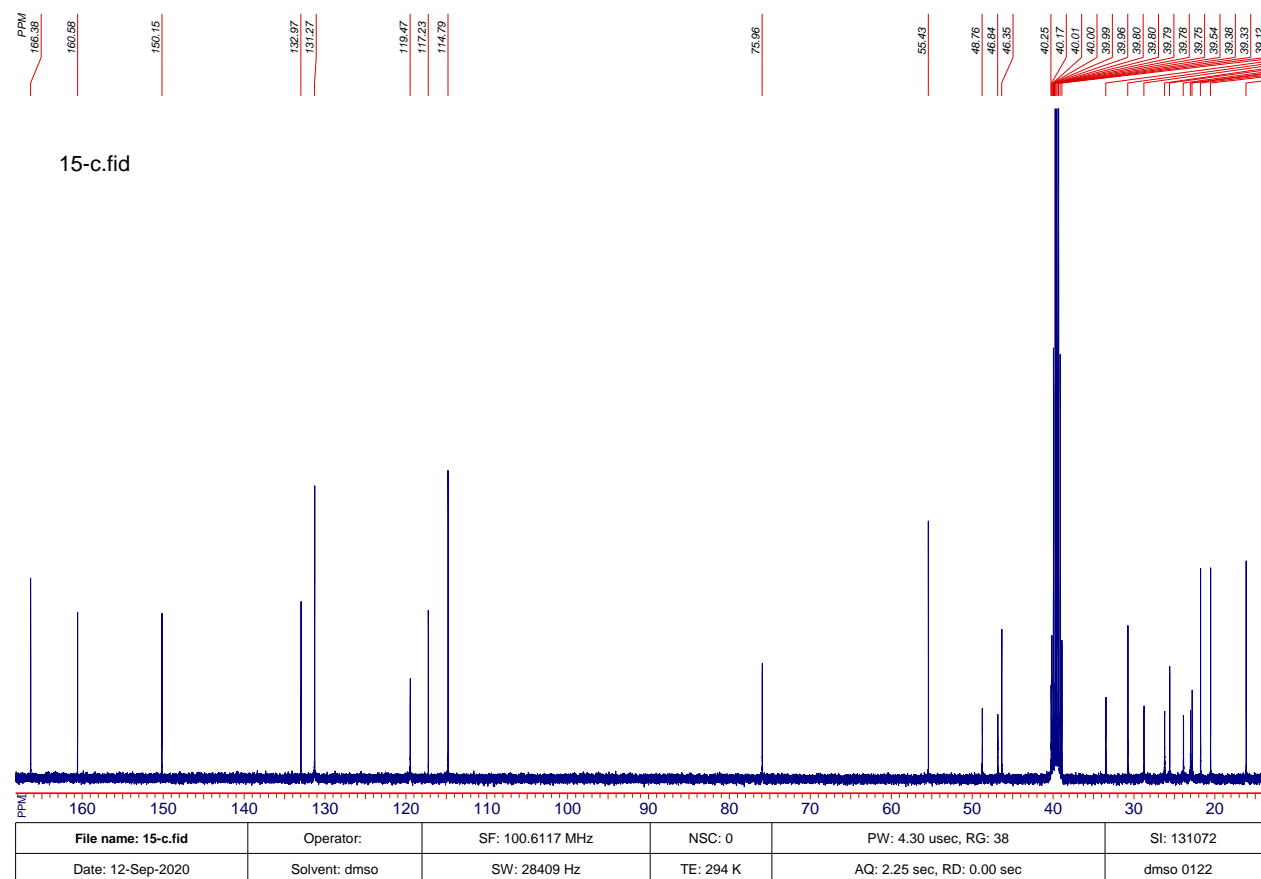

*4-(3,4-Dichlorophenyl)-1-(4-methoxyphenyl)-5,6,7,8-tetrahydro-2a,4a-diazacyclopenta[cd]azulene*  
**(14)**

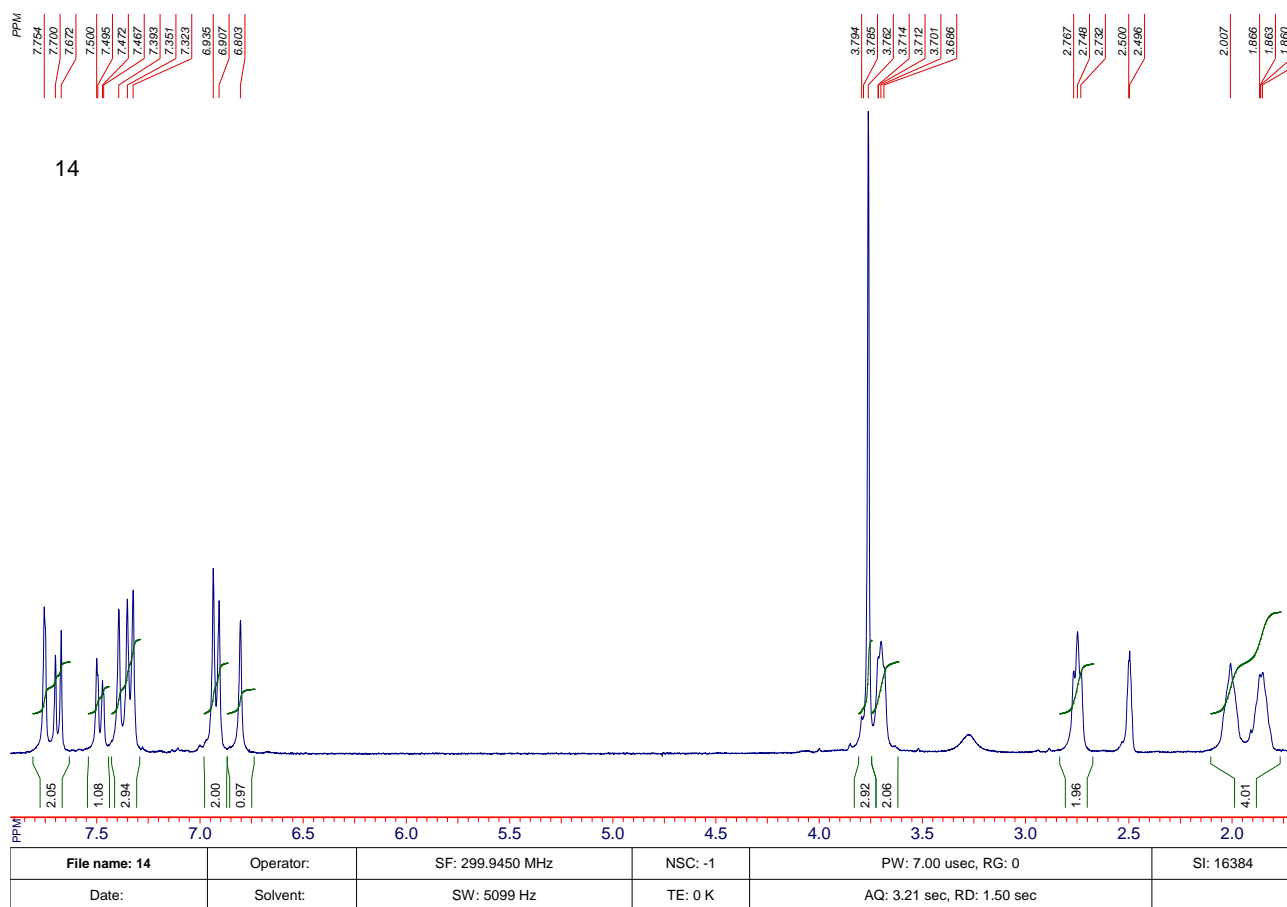

Supplement: s1 [file s1]
